# Supplementary material for: Syntheses of ylidenbutenolide-modified derivatives of peridinin and their stereochemical and spectral characteristics
Source: Royal Society of Chemistry journal article supplement (doi:10.1039/c002006k), 2010-01-01

**General.** All commercially available reagents were used without further purification. All solvents were used after distillation. Tetrahydrofuran (THF) were refluxed over and distilled from sodium-benzophenone ketyl. Dimethylformamide (DMF) and dimethyl sulfoxide (DMSO) were distilled from CaH<sub>2</sub> under reduced pressure. Preparative separation was performed by column chromatography on silica gel. <sup>1</sup>H NMR and <sup>13</sup>C NMR spectra were recorded on a 400MHz and 750 MHz spectrometer and chemical shifts were represented as δ-values relative to the internal standard TMS. IR spectra were recorded on a FT-IR Spectrometer. High-resolution mass spectra (HRMS) were measured on a ESI-TOF MS.

**(3Z,5E)-6-[(1'S,2'R,4'S)-1',2'-epoxy-4'-Hydroxy-2',6',6'-trimethylcyclohex-1'-yl]-4-methoxycarbonylhexa-3,5-dien-1-yne (12).** To a solution of dibromide **11** (684 mg, 1.21 mmol) in THF (12.1 mL) was added tetra-*n*-butylammonium fluoride (7.27 mL, 1.0 M solution in THF) at room temperature. After being stirred for 2 h at 55 °C, the reaction mixture was poured into a saturated aqueous NH<sub>4</sub>Cl solution, and then extracted with ethyl acetate. The organic layers were combined, washed with brine, dried over MgSO<sub>4</sub>, filtered and concentrated *in vacuo*. Purification by silica gel column chromatography (from 10% to 50% ethyl acetate in hexane) afforded alkyne **12** (144 mg, 41%): [ $\alpha$ ]<sub>D</sub><sup>23</sup> -64.7 (c 0.95, CHCl<sub>3</sub>); IR (neat, cm<sup>-1</sup>) 3424, 3291, 2961, 2782, 2097, 1782, 1578, 1437, 1375, 1229, 1159, 1049, 974; <sup>1</sup>H NMR (CDCl<sub>3</sub>, 400 MHz) δ 6.24 (s, 2H), 5.83 (d, *J* = 2.7 Hz, 1H), 3.88 (m, 1H), 3.85 (s, 3H), 3.41 (d, *J* = 2.8 Hz, 1H), 2.36 (dd, *J* = 14.2, 4.5 Hz, 1H), 1.63-1.57 (m, 2H), 1.22 (dd, *J* = 12.8, 11.0 Hz, 1H), 1.18 (s, 3H), 1.12 (s, 3H), 0.96 (s, 3H); <sup>13</sup>C NMR (CDCl<sub>3</sub>, 100 MHz) δ 166.8, 143.4, 132.2, 129.1, 113.4, 87.3, 80.4, 70.3, 67.7, 64.3, 52.4, 47.3, 41.1, 35.6, 29.6, 25.1, 20.1; ESI-HRMS *m/z* Calcd for C<sub>17</sub>H<sub>22</sub>O<sub>4</sub> (M+Na)<sup>+</sup> 313.1416, found 313.1413.

**(2E,6Z,8E)-9-[(1'S,2'R,4'S)-1',2'-Epoxy-4'-hydroxy-2',6',6'-trimethylcyclohex-1'-yl]-7-methoxycarbonyl-3-methylnona-2,6,8-trien-4-yn-1-ol (12').** To a solution of vinyl iodide **13** (174 mg, 0.878 mmol), tetrakis(triphenylphosphine)palladium (41 mg, 0.035 mmol) and triethylamine (0.15 mL, 1.05 mmol) in THF (2.2 mL) was added a solution of alkyne **12** (102 mg, 0.35 mmol) in THF (0.6 mL) and CuI (7 mg, 0.035 mmol). After being stirred for 40 min at room temperature, the reaction mixture was poured into a saturated aqueous NH<sub>4</sub>Cl solution, and then the resulting mixture was extracted with ethyl acetate. The organic layers were combined, dried over MgSO<sub>4</sub>, filtered and concentrated *in vacuo*. Purification by silica gel column chromatography (from 50% to 70% ethyl acetate in hexane) afforded diol **12'** (83 mg, 66%): [ $\alpha$ ]<sub>D</sub><sup>23</sup> -77.9 (c 0.62, CHCl<sub>3</sub>); IR (neat, cm<sup>-1</sup>) 3395, 2962, 2930, 1722, 1437, 1379, 1219, 1157, 1047; <sup>1</sup>H NMR (400 MHz, CDCl<sub>3</sub>) δ 6.26 (s, 2H), 6.03 (td, *J* = 6.4, 1.4 Hz, 1H), 6.00 (s, 1H), 4.26 (d, *J*

=6.6 Hz, 2H), 3.88 (m, 1H), 3.86 (s, 3H), 2.37 (ddd,  $J=14.2, 5.0, 1.6$  Hz, 1H), 1.86 (s, 3H), 1.66-1.57 (m, 2H), 1.25-1.20 (m, 1H), 1.19 (s, 3H), 1.14 (s, 3H), 0.97 (s, 3H);  $^{13}\text{C}$  NMR (100 MHz,  $\text{CDCl}_3$ )  $\delta$  166.9, 140.7, 137.4, 131.0, 129.5, 121.0, 115.1, 102.1, 85.3, 70.4, 67.7, 64.5, 59.6, 52.2, 47.4, 41.2, 35.6, 29.7, 25.1, 20.1, 17.7; ESI-HRMS  $m/z$  Calcd for  $\text{C}_{21}\text{H}_{28}\text{O}_5$  ( $\text{M}+\text{Na}$ ) $^+$  383.1834, found 383.1846.

**Acetylene Methyl Ester Derivative (2).** To a solution of diol **12'** (30 mg, 0.08 mmol) in diethyl ether (0.8 mL) was added manganese dioxide (499 mg) at room temperature. After being stirred at the same temperature for 10 min, the reaction mixture was filtered through a pad of Celite. The solvents were removed *in vacuo* to afford crude aldehyde **6**, which was used to the next reaction without further purification.

To a solution of the sulfone **4** (40 mg, 0.083 mmol) and crude aldehyde **6** in THF (2 mL) was added dropwise sodium bis(trimethylsilyl)amide (1.0M in THF, 0.32 mL, 0.32 mmol) at  $-78$  °C in the dark. After being stirred for 5 min at the same temperature, the reaction mixture was poured into water, and then extracted with diethyl ether. The organic layers were combined, washed with brine, dried over  $\text{MgSO}_4$ , filtered and concentrated *in vacuo*. Purification by short silica gel column chromatography (from 30% to 60% ethyl acetate in hexane) in the dark afforded a mixture of all-*trans*-peridinin derivative **2** and its *cis*-isomer (34 mg, 63%) as a red film. A solution of a mixture of peridinin derivative **2** in benzene was left at room temperature under fluorescent light. After 8 days, the separation by preparative HPLC [column: Develosil CN-UG (0.6 x 25 cm); mobile phase: acetone / *n*-hexane = 1/6; flow rate: 2 mL / min.; UVdetect: 410 nm; retention time: (all-*trans*-isomer **2-1**) 40 min., (13Z-isomer **2-2**) 41 min.] in the dark gave crude peridinin derivative **2**, which was further purified by preparative HPLC [column: YMC Carotenoid C30 (10 x 250 mm); reverse phase: acetonitrile / methanol / water = 87 / 10 / 3; flow rate: 2 mL / min.; UVdetect: 410 nm; retention time: (all-*trans*-isomer) 15 min] in the dark, afforded the desired optically active peridinin derivative **2-1** as an orange powder: 13E-isomer **2-1**; IR (neat,  $\text{cm}^{-1}$ ) 3505, 2929, 2161, 1931, 1713, 1437, 1363, 1223, 1161, 1032;  $^1\text{H}$  NMR (750 MHz,  $\text{CDCl}_3$ )  $\delta$  6.58 (dd,  $J=14.2, 11.9$  Hz, 1H), 6.49 (d,  $J=11.4$  Hz, 1H), 6.46 (dd,  $J=13.2, 13.2$  Hz, 1H), 6.41 (dd,  $J=12.9, 12.9$  Hz, 1H), 6.32 (dd,  $J=14.3, 11.0$  Hz, 1H), 6.27 (s, 2H), 6.08 (d,  $J=11.8$  Hz, 1H), 6.07 (s, 1H), 6.04 (s, 1H), 5.38 (m, 1H), 3.89 (m, 1H), 3.87 (s, 3H), 2.37 (dd,  $J=14.1, 4.8$  Hz, 1H), 2.28 (dd,  $J=10.7$  Hz, 1H), 2.04 (s, 3H), 1.99 (m, 1H), 1.96 (s, 3H), 1.79 (s, 3H), 1.63 (m, 2H), 1.50 (dd,  $J=12.0, 12.0$  Hz, 1H), 1.42 (m, 1H), 1.38 (s, 3H), 1.35 (s, 3H), 1.34 (m, 1H), 1.20 (s, 3H), 1.14 (s, 3H), 1.07 (s, 3H), 0.97 (s, 3H);  $^{13}\text{C}$  NMR (188 MHz,  $\text{CDCl}_3$ )  $\delta$  202.5, 170.4, 166.6, 137.8, 135.9, 132.7, 131.3, 130.3, 129.4, 128.0, 127.8, 117.7, 117.6, 115.4, 103.3, 87.6, 81.0, 72.7, 67.9, 67.6, 64.2, 51.6, 46.6, 45.4, 45.2, 40.9, 35.8, 35.3, 32.1, 29.4, 24.9, 21.4, 19.9, 17.5, 14.0; ESI-HRMS  $m/z$  Calcd for  $\text{C}_{40}\text{H}_{52}\text{O}_7$  ( $\text{M}+\text{Na}$ ) $^+$  667.3611, found 667.3609; 13Z-isomer

**2-2**; <sup>1</sup>H NMR (750 MHz, CDCl<sub>3</sub>) δ 6.93 (d, *J* = 9.7 Hz, 1H), 6.71 (dd, *J* = 14.2, 9.8 Hz, 1H), 6.59 (dd, *J* = 14.1, 11.6 Hz, 1H), 6.28 (s, 1H), 6.20 (m, 2H), 6.11 (d, *J* = 11.4 Hz, 1H), 6.08 (s, 1H), 6.05 (s, 1H), 5.38 (m, 1H), 3.90 (m, 1H), 3.88 (s, 3H), 2.38 (ddd, *J* = 14.5, 4.8, 1.4 Hz, 1H), 2.28 (m, 1H), 2.04 (s, 3H), 1.99 (m, 1H), 1.96 (s, 3H), 1.80 (s, 3H), 1.64 (m, 2H), 1.50 (dd, *J* = 11.7, 11.7 Hz, 1H), 1.40 (m, 1H), 1.38 (s, 3H), 1.35 (s, 3H), 1.25 (m, 1H), 1.20 (s, 3H), 1.15 (s, 3H), 1.07 (s, 3H), 0.98 (s, 3H); <sup>13</sup>C NMR (188 MHz, CDCl<sub>3</sub>) δ 202.6, 170.4, 166.6, 139.4, 134.0, 132.5, 132.0, 131.9, 130.5, 128.0, 127.6, 124.1, 119.0, 117.6, 115.3, 105.0, 103.3, 72.7, 70.1, 67.9, 67.4, 64.2, 51.8, 47.0, 45.4, 45.2, 40.9, 35.8, 35.3, 32.1, 31.3, 30.3, 30.1, 24.9, 21.4, 19.9, 17.2, 14.0.

**(1Z,3Z,5E)-6-[(1'S,2'R,4'S)-4'-tert-Butyldimethylsiloxy-1',2'-epoxy-2',6',6'-trimethylcyclohex-1'-yl]-1-bromo-4-methoxycarbonyl-hexa-1,3,5-triene (15).** To a suspension of bromomethyltriphenylphosphonium bromide (2.02 g, 4.63 mmol) in THF (7.72 mL) was added dropwise sodium bis(trimethylsilyl)amide (1.0M in THF, 4.32 mL, 4.32 mmol) at -30 °C. After the mixture was stirred for 5 min at -30 °C, a solution of  $\gamma$ -hydroxybutenolide **9** (609 mg, 1.54 mmol) and diisopropylethylamine (0.81 mL, 4.63 mmol) in DMF (7.72 mL) was added. After being stirred for 15 min at room temperature, methyl iodide (0.57 mL, 9.26 mmol) was added. After being stirred for 15 min at the same temperature, the reaction mixture was poured into water, and then extracted with ethyl acetate. The organic layers were combined, washed with brine, dried over MgSO<sub>4</sub>, filtered and concentrated *in vacuo*. Purification by silica gel column chromatography (from 5% to 10% ethyl acetate in hexane) afforded triene bromide **15** (511 mg, 69%) as a mixture of E and Z isomer: Z-isomer [ $\alpha$ ]<sub>D</sub><sup>23</sup> -35.7 (c 0.76, CHCl<sub>3</sub>); IR (neat, cm<sup>-1</sup>) 2957, 2930, 2858, 1726, 1462, 1381, 1257, 1151, 1078; <sup>1</sup>H NMR (400 MHz, CDCl<sub>3</sub>) δ 7.18 (dd, *J* = 11.0, 7.1 Hz, 1H), 6.77 (d, *J* = 11.2 Hz, 1H), 6.46 (d, *J* = 7.4, 0.9 Hz, 1H), 6.31 (d, *J* = 15.8 Hz, 1H), 6.24 (d, *J* = 15.8 Hz, 1H), 3.84 (s, 3H), 3.83 (m, 1H), 2.25 (m, 1H), 1.64 (dd, *J* = 14.4, 8.2 Hz, 1H), 1.51 (m, 1H), 1.26 (m, 1H), 1.19 (s, 3H), 1.13 (s, 3H), 0.97 (s, 3H), 0.88 (s, 9H), 0.07 (s, 6H); <sup>13</sup>C NMR (100 MHz, CDCl<sub>3</sub>) δ 167.6, 134.1, 131.0, 130.9, 130.5, 129.2, 114.9, 70.6, 67.5, 65.0, 52.3, 47.4, 41.7, 35.5, 29.6, 26.2, 25.3, 20.4, 18.5, -4.4; ESI-HRMS *m/z* Calcd for C<sub>23</sub>H<sub>37</sub>BrO<sub>4</sub>Si (M+Na)<sup>+</sup> 507.1542, found 507.1530; E-isomer <sup>1</sup>H NMR (400 MHz, CDCl<sub>3</sub>) δ 7.30 (dd, *J* = 13.5, 11.9 Hz, 1H), 6.63 (d, *J* = 14.2 Hz, 1H), 6.31 (d, *J* = 11.9 Hz, 1H), 6.22 (d, *J* = 15.6 Hz, 1H), 6.18 (d, *J* = 15.6 Hz, 1H), 3.84 (s, 3H), 3.83 (m, 1H), 2.24 (m, 1H), 1.64 (m, 1H), 1.50 (m, 1H), 1.26 (m, 1H), 1.17 (s, 3H), 1.12 (s, 3H), 0.95 (s, 3H), 0.88 (s, 9H), 0.04 (s, 6H); <sup>13</sup>C NMR (100 MHz, CDCl<sub>3</sub>) δ 167.3, 134.6, 133.7, 133.4, 131.6, 130.2, 116.1, 70.7, 67.6, 65.0, 52.2, 47.3, 41.7, 35.5, 29.6, 26.2, 25.3, 20.4, 18.5, -4.4.

**(2E,4E,6E,8E)-9-[(1'S,2'R,4'S)-4'-tert-Butyldimethylsiloxy-1',2'-epoxy-2',6',6'-trimethylcyclohex-1'-yl]-7-methoxycarbonyl-3-methylnona-2,4,6,8-tetraen-1-ol (17)**. To a solution of triene bromide **15** (178 mg, 0.37 mmol) and vinylstannane **16** (398 mg, 1.10 mmol) in DMSO (1.84 mL) was added bis(acetonitrile)dichloropalladium(II) (5 mg, 0.02 mmol) and lithium chloride (31 mg, 0.73 mmol). After being stirred for 30 min at 60 °C, the reaction mixture was poured into water, and then extracted with ethyl acetate. The organic layers were combined, washed with brine, dried over MgSO<sub>4</sub>, filtered and concentrated *in vacuo*. Purification by silica gel column chromatography (from 10% to 30% ethyl acetate in hexane) afforded coupling product **17** (87 mg, 50%): [ $\alpha$ ]<sub>D</sub><sup>23</sup> -18.7 (c 1.05, CHCl<sub>3</sub>); IR (neat, cm<sup>-1</sup>) 3449, 2957, 2930, 2858, 1714, 1597, 1435, 1363, 1228, 1084; <sup>1</sup>H NMR (400 MHz, CDCl<sub>3</sub>)  $\delta$  7.19 (d, *J* = 11.2, 1H), 6.66 (dd, *J* = 15.1, 11.2, 1H), 6.59 (d, *J* = 15.1, 1H), 6.50 (d, *J* = 15.8 Hz, 1H), 6.46 (d, *J* = 15.8, 1H), 5.85 (t, *J* = 6.9 Hz, 1H), 4.34 (m, 2H), 3.85 (m, 1H), 3.78 (s, 3H), 2.26 (dd, *J* = 14.2, 5.1 Hz, 1H), 1.84 (s, 3H), 1.67 (m, 1H), 1.55 (m, 1H), 1.26 (m, 1H), 1.24 (s, 3H), 1.17 (s, 3H), 1.01 (s, 3H), 0.88 (s, 9H), 0.05 (s, 6H); <sup>13</sup>C NMR (100 MHz, CDCl<sub>3</sub>)  $\delta$  168.0, 144.8, 139.4, 136.0, 135.4, 132.0, 127.5, 124.9, 123.4, 71.0, 67.5, 65.0, 59.7, 52.1, 47.3, 41.7, 35.4, 29.8, 26.2, 25.3, 20.4, 18.4, 12.9, -4.5; ESI-HRMS *m/z* Calcd for C<sub>27</sub>H<sub>44</sub>O<sub>5</sub>Si (M+Na)<sup>+</sup> 499.2856, found 499.2845; 9'Z-isomer <sup>1</sup>H NMR (400 MHz, CDCl<sub>3</sub>)  $\delta$  6.91 (dd, *J* = 15.4, 11.9, 1H), 6.53 (d, *J* = 11.7, 1H), 6.47 (d, *J* = 15.6, 1H), 6.26 (d, *J* = 15.5 Hz, 1H), 6.14 (d, *J* = 15.6, 1H), 5.81 (t, *J* = 6.9 Hz, 1H), 4.40 (m, 2H), 3.85 (m, 1H), 3.84 (s, 3H), 2.24 (dd, *J* = 14.2, 5.1 Hz, 1H), 1.84 (s, 3H), 1.65 (m, 1H), 1.55 (m, 1H), 1.26 (m, 1H), 1.24 (s, 3H), 1.17 (s, 3H), 1.01 (s, 3H), 0.88 (s, 9H), 0.05 (s, 6H).

**(2E,4E,6E,8E)-9-[(1'S,2'R,4'S)-1',2'-Epoxy-4'-hydroxy-2',6',6'-trimethylcyclohex-1'-yl]-7-methoxycarbonyl-3-methylnona-2,4,6,8-tetraen-1-ol (17')**. To a solution of tetraene alcohol **17** (45 mg, 0.09 mmol) in THF (1 mL) was added tetra-*n*-butylammonium fluoride (1.0M in THF, 0.24 mL, 0.24 mmol) at 45 °C. After being stirred for 3 h at the same temperature, the reaction mixture was poured into a saturated aqueous NH<sub>4</sub>Cl solution, and then extracted with diethyl ether. The organic layers were combined, washed with brine, dried over MgSO<sub>4</sub>, filtered and concentrated *in vacuo*. Purification by short silica gel column chromatography (from 50% to 70% ethyl acetate in hexane) afforded tetraene diol **17'** (22 mg, 65%): [ $\alpha$ ]<sub>D</sub><sup>24</sup> -21.5 (c 0.61, CHCl<sub>3</sub>); IR (neat, cm<sup>-1</sup>) 3427, 2959, 1713, 1597, 1437, 1375, 1238, 1047, 974, 758; <sup>1</sup>H NMR (400 MHz, CDCl<sub>3</sub>)  $\delta$  7.19 (d, *J* = 11.0, 1H), 6.67 (dd, *J* = 15.1, 11.0, 1H), 6.59 (d, *J* = 15.1, 1H), 6.48 (s, 2H), 5.85 (t, *J* = 6.9 Hz, 1H), 4.33 (d, *J* = 6.8 Hz, 2H), 3.90 (m, 1H), 3.78 (s, 3H), 2.39 (ddd, *J* = 14.2, 5.4, 1.8 Hz, 1H), 1.83 (s, 3H), 1.64 (m, 2H), 1.25 (m, 1H), 1.25 (s, 3H), 1.18 (s, 3H), 1.02 (s, 3H); <sup>13</sup>C NMR (100 MHz, CDCl<sub>3</sub>)  $\delta$  168.0, 144.8, 139.5, 136.2, 135.2, 131.8, 127.5, 125.1, 123.6, 70.8, 67.5, 64.6, 59.9, 52.2, 47.4, 41.2, 35.6, 29.9, 25.2, 20.2, 13.0; ESI-HRMS *m/z* Calcd for C<sub>21</sub>H<sub>30</sub>O<sub>5</sub>

(M+Na)<sup>+</sup> 385.1991, found 385.1986.

**9'E-Olefin methyl ester derivative (3).** To a solution of **17'** (24 mg, 0.067 mmol) in diethyl ether (0.66 mL) was added manganese dioxide (0.397 g) at room temperature. After being stirred at the same temperature for 5 min, the reaction mixture was filtered through a pad of Celite. The solvents were removed *in vacuo* to afford crude aldehyde **7**, which was used to the next reaction without further purification.

To a solution of the sulfone **4** (34 mg, 0.067 mmol) and aldehyde **7** in THF (1.56 mL) was added dropwise sodium bis(trimethylsilyl)amide (1.0M in THF, 0.31 mL, 0.31 mmol) at -78 °C in the dark. After being stirred for 5 min at the same temperature, the reaction mixture was poured into water, and then extracted with diethyl ether. The organic layers were combined, washed with brine, dried over MgSO<sub>4</sub>, filtered and concentrated *in vacuo*. Purification by short silica gel column chromatography (from 30% to 60% ethyl acetate in hexane) in the dark afforded a mixture of peridinin derivative **3** (20 mg, 46%) as a red film. A solution of a mixture of peridinin derivative **3** in benzene was left at room temperature under fluorescent light. After 5 days, the separation by preparative HPLC [column: Develosil CN-UG (0.6 x 25 cm); mobile phase: acetone / *n*-hexane = 1/6; flow rate: 2 mL / min.; UVdetect: 430 nm; retention time: (13Z, 9'E)-isomer **3-1** 35 min., (13E, 9'E)-isomer **3-2** 37 min.] in the dark gave crude peridinin derivative **3**, which was further purified by preparative HPLC [column: YMC Carotenoid C30 (10 x 250 mm); reverse phase: acetonitrile / methanol / water = 87 / 10 / 3; flow rate: 2 mL / min.; UVdetect: 430 nm; retention time: (13E, 9'E)-derivative 31 min] in the dark, afforded the optically active 9'E-olefin methyl ester peridinin derivative **3-2** as a red powder: (13E, 9'E)-isomer **3-2**: IR (neat, cm<sup>-1</sup>) 3433, 2926, 2855, 1929, 1711, 1437, 1364, 1246, 1163, 1032; <sup>1</sup>H NMR (750 MHz, CDCl<sub>3</sub>) δ 7.24 (d, *J* = 11.7 Hz, 1H), 6.72 (dd, *J* = 15.1, 11.7 Hz, 1H), 6.65 (d, *J* = 15.4 Hz, 1H), 6.59 (m, 2H), 6.53 (d, *J* = 15.8 Hz, 1H), 6.50 (d, *J* = 16.0 Hz, 1H), 6.47 (dd, *J* = 14.4, 11.3 Hz, 1H), 6.37 (dd, *J* = 14.4, 11.0 Hz, 1H), 6.32 (d, *J* = 11.0 Hz, 1H), 6.10 (d, *J* = 11.3 Hz, 1H), 6.05 (s, 1H), 5.38 (m, 1H), 3.93 (m, 1H), 3.78 (s, 3H), 2.41 (dd, *J* = 14.7, 4.5 Hz, 1H), 2.29 (m, 1H), 2.04 (s, 3H), 1.99 (m, 1H), 1.95 (s, 3H), 1.80 (s, 3H), 1.66 (m, 2H), 1.50 (m, 1H), 1.42 (m, 1H), 1.38 (s, 3H), 1.35 (s, 3H), 1.26 (m, 1H), 1.25 (s, 3H), 1.20 (s, 3H), 1.07 (s, 3H), 1.03 (s, 3H); <sup>13</sup>C NMR (188 MHz, CDCl<sub>3</sub>) δ 202.6, 170.7, 167.9, 139.6, 136.3, 136.1, 133.0, 131.1, 128.9, 127.9, 127.6, 126.2, 125.0, 123.0, 120.9, 117.3, 103.3, 80.4, 77.5, 67.1, 64.3, 51.8, 47.2, 45.4, 45.2, 41.0, 35.8, 31.9, 31.2, 29.3, 29.2, 25.0, 21.4, 20.0, 14.1, 14.0; ESI-HRMS *m/z* Calcd for C<sub>40</sub>H<sub>54</sub>O<sub>7</sub> (M+Na)<sup>+</sup> 669.3767, found 669.3758; (13Z, 9'E)-isomer **3-1**: <sup>1</sup>H NMR (750 MHz, CDCl<sub>3</sub>) δ 7.25 (d, *J* = 11.7 Hz, 1H), 6.75 (m, 3H), 6.71 (d, *J* = 14.7 Hz, 1H), 6.60 (dd, *J* = 14.1, 11.7 Hz, 1H), 6.51 (s, 1H), 6.38 (dd, *J* = 11.7, 11.7 Hz, 1H), 6.25 (dd, *J* = 11.3, 11.3 Hz, 1H), 6.15 (d, *J* = 11.7 Hz, 1H), 6.06 (s, 1H),

5.38 (m, 1H), 3.93 (m, 1H), 3.78 (s, 3H), 2.41 (ddd,  $J=14.1, 5.7, 1.0$  Hz, 1H), 2.28 (m, 1H), 2.04 (s, 3H), 2.00 (m, 1H), 1.95 (s, 3H), 1.80 (s, 3H), 1.66 (m, 2H), 1.50 (m, 1H), 1.42 (m, 1H), 1.39 (s, 3H), 1.36 (s, 3H), 1.29 (m, 1H), 1.27 (s, 3H), 1.20 (s, 3H), 1.07 (s, 3H), 1.03 (s, 3H);  $^{13}\text{C}$  NMR (188 MHz,  $\text{CDCl}_3$ )  $\delta$  202.8, 179.1, 174.8, 167.8, 145.5, 143.5, 139.4, 136.0, 131.9, 131.7, 131.3, 130.7, 128.1, 127.8, 127.3, 124.8, 124.0, 117.2, 103.3, 72.7, 70.6, 68.0, 64.3, 47.1, 45.4, 45.2, 41.0, 35.8, 31.9, 31.2, 29.3, 29.1, 21.4, 20.0, 14.1, 12.5.

```

Filename = a2-alkyne-ester-1H-4.
Author = delta
Experiment = single_pulse.ex2
Sample_id = 1
Solvent = CHLOROFORM-D
Creation_time = 10-DEC-2009 17:17:25
Revision_time = 12-DEC-2009 14:43:12
Current_time = 12-DEC-2009 14:43:56

Comment = single_pulse
Data_format = ID COMPLEX
Dim_size = 13107
Dim_title = 1H
Dim_units = [ppm]
Dimensions = X
Site = ECX400M
Spectrometer = DELTA2_NMR

Field_strength = 9.389766[T] (400[MHz])
X_acq_duration = 2.18365952[s]
X_domain = 1H
X_freq = 399.78219838[MHz]
X_offset = 4[ppm]
X_points = 16384
X_prescans = 1
X_resolution = 0.45794685[Hz]
X_sweep = 7.5030012[KHz]
Irr_domain = 1H
Irr_freq = 399.78219838[MHz]
Irr_offset = 5[ppm]
Irr_domain = 1H
Tri_freq = 399.78219838[MHz]
Tri_offset = 5[ppm]
Clipped = FALSE
Mod_return = 1
Scans = 8
Total_scans = 8

X_90_width = 10.5[us]
X_acq_time = 2.18365952[s]
X_angle = 45[deg]
X_atn = 1.4[dB]
X_pulse = 5.25[us]
Irr_mode = Off
Tri_mode = Off
Dante_presat = FALSE
Initial_wait = 1[s]
Recvr_gain = 34
Relaxation_delay = 1[s]
Repetition_time = 3.18365952[s]
Temp_get = 24.6[dc]

```

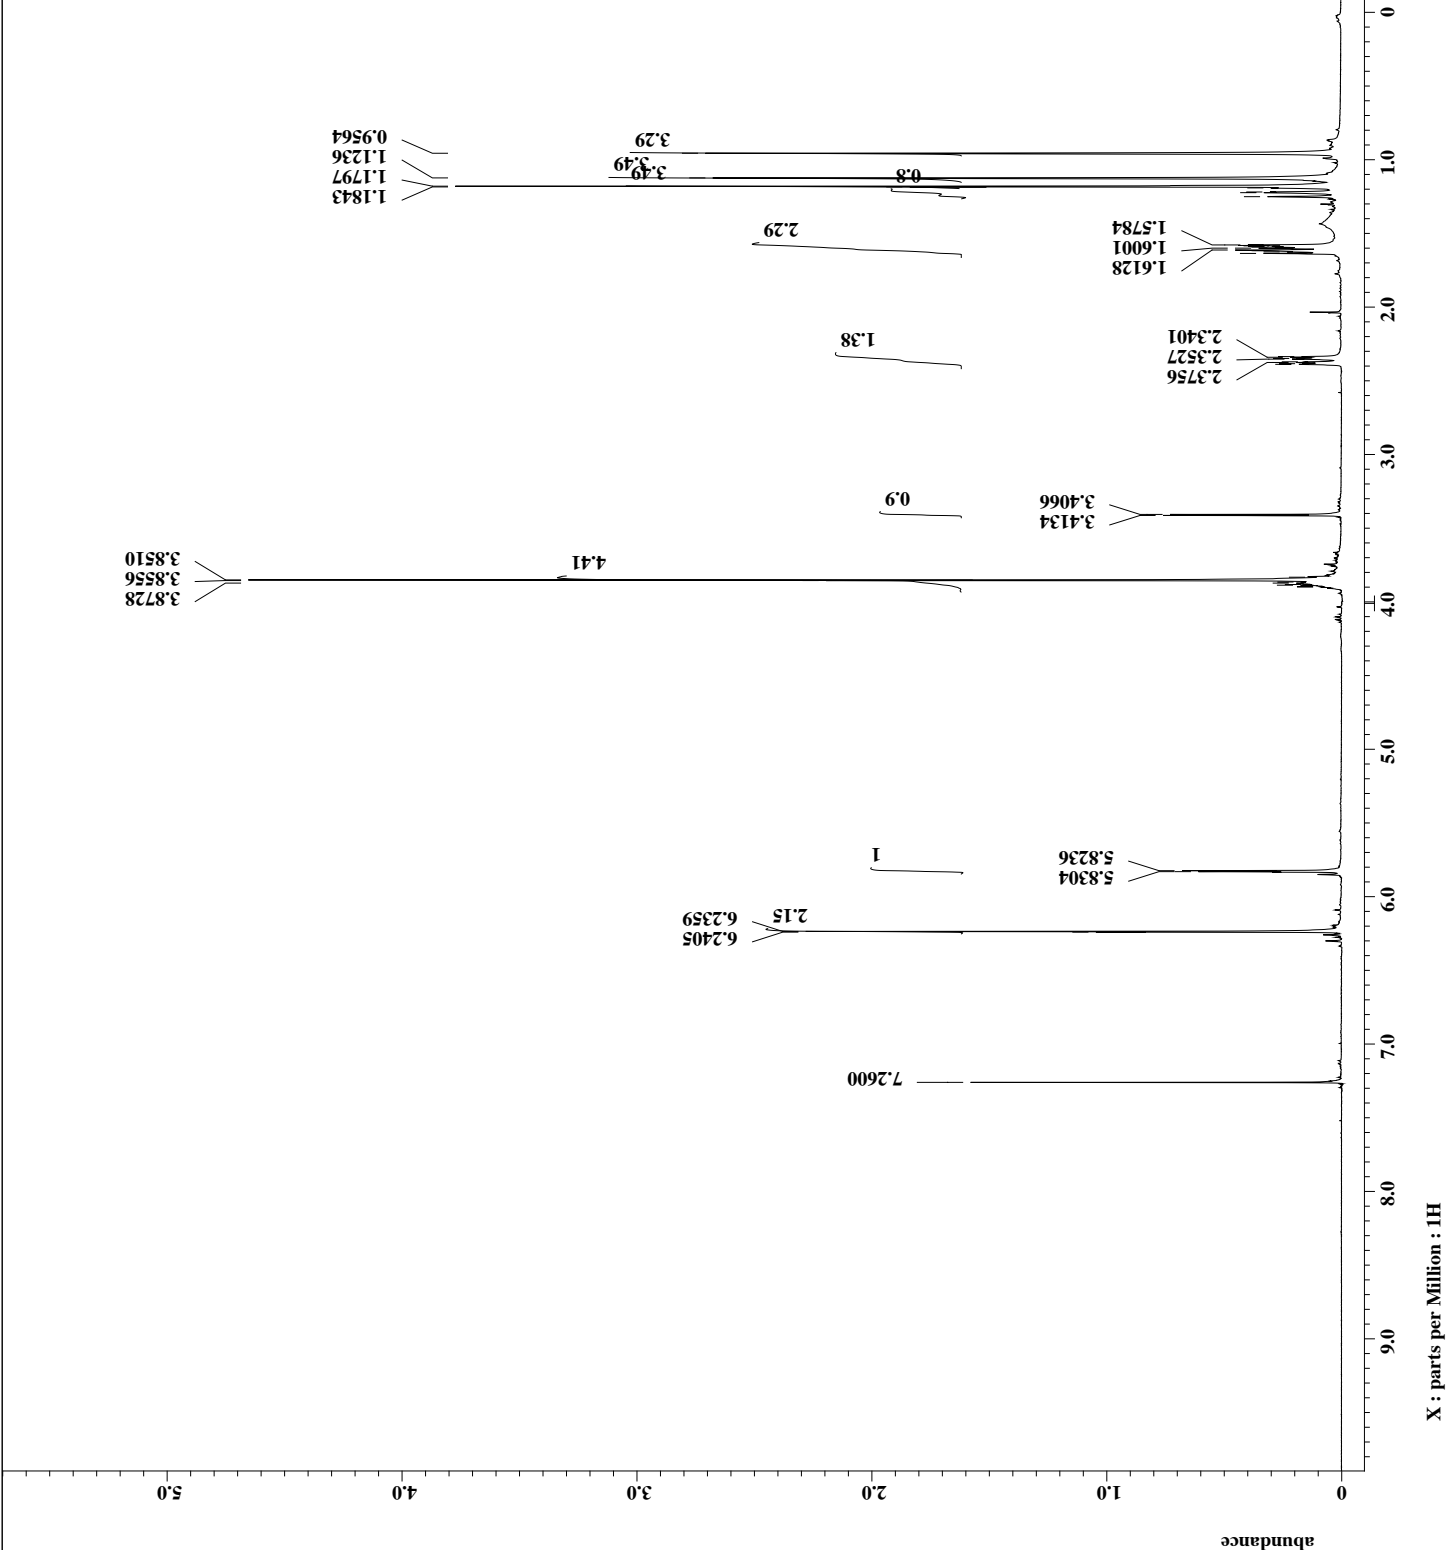

X : parts per Million : 1H

12

```

File name      = a2-alkyne-ester-13C-3
Author        = delta
Experiment    = single_pulse_dec
Sample ID     = S#354684
Solvent       = CHLOROFORM-D
Creation time = 11-DEC-2009 09:01:37
Revision time = 12-DEC-2009 18:16:51
Current time  = 12-DEC-2009 18:17:12

Comment       = single pulse decouple
Data format   = ID COMPLEX
Dim Size      = 26214
Dim Title     = 13C
Dim Units     = [ppm]
Dimensions    = X
Site          = ECX400M
Spectrometer = DELTA2_NMR

Field strength = 9.389766[T] (400[MHz])
X_acq_duration = 1.04333312[s]
X_domain       = 13C
X_freq         = 100.52530333[MHz]
X_offset       = 100[ppm]
X_points       = 32768
X_prescans     = 4
X_resolution   = 0.95846665[Hz]
X_sweep        = 31.40703518[kHz]
X_domain       = 1H
Irr_freq       = 399.78219838[MHz]
Irr_offset     = 5[ppm]
Clipped        = FALSE
Mod_return     = 1
Scans          = 153
Total_scans    = 153

X_90_width     = 9.2[us]
X_acq_time     = 1.04333312[s]
X_angle        = 45[deg]
X_atn          = 6.6[db]
X_pulse        = 4.6[us]
Irr_atn_dec    = 22.2[db]
Irr_atn_noe    = 22.2[db]
Irr_noise      = WAITZ
Decoupling     = TRUE
Initial_wait   = 1[s]
Noe            = TRUE
Noe_time       = 5[s]
Recvr_gain     = 50
Relaxation_delay = 5[s]
Repetition_time = 6.04333312[s]
Temp_get       = 24.1[dc]

```

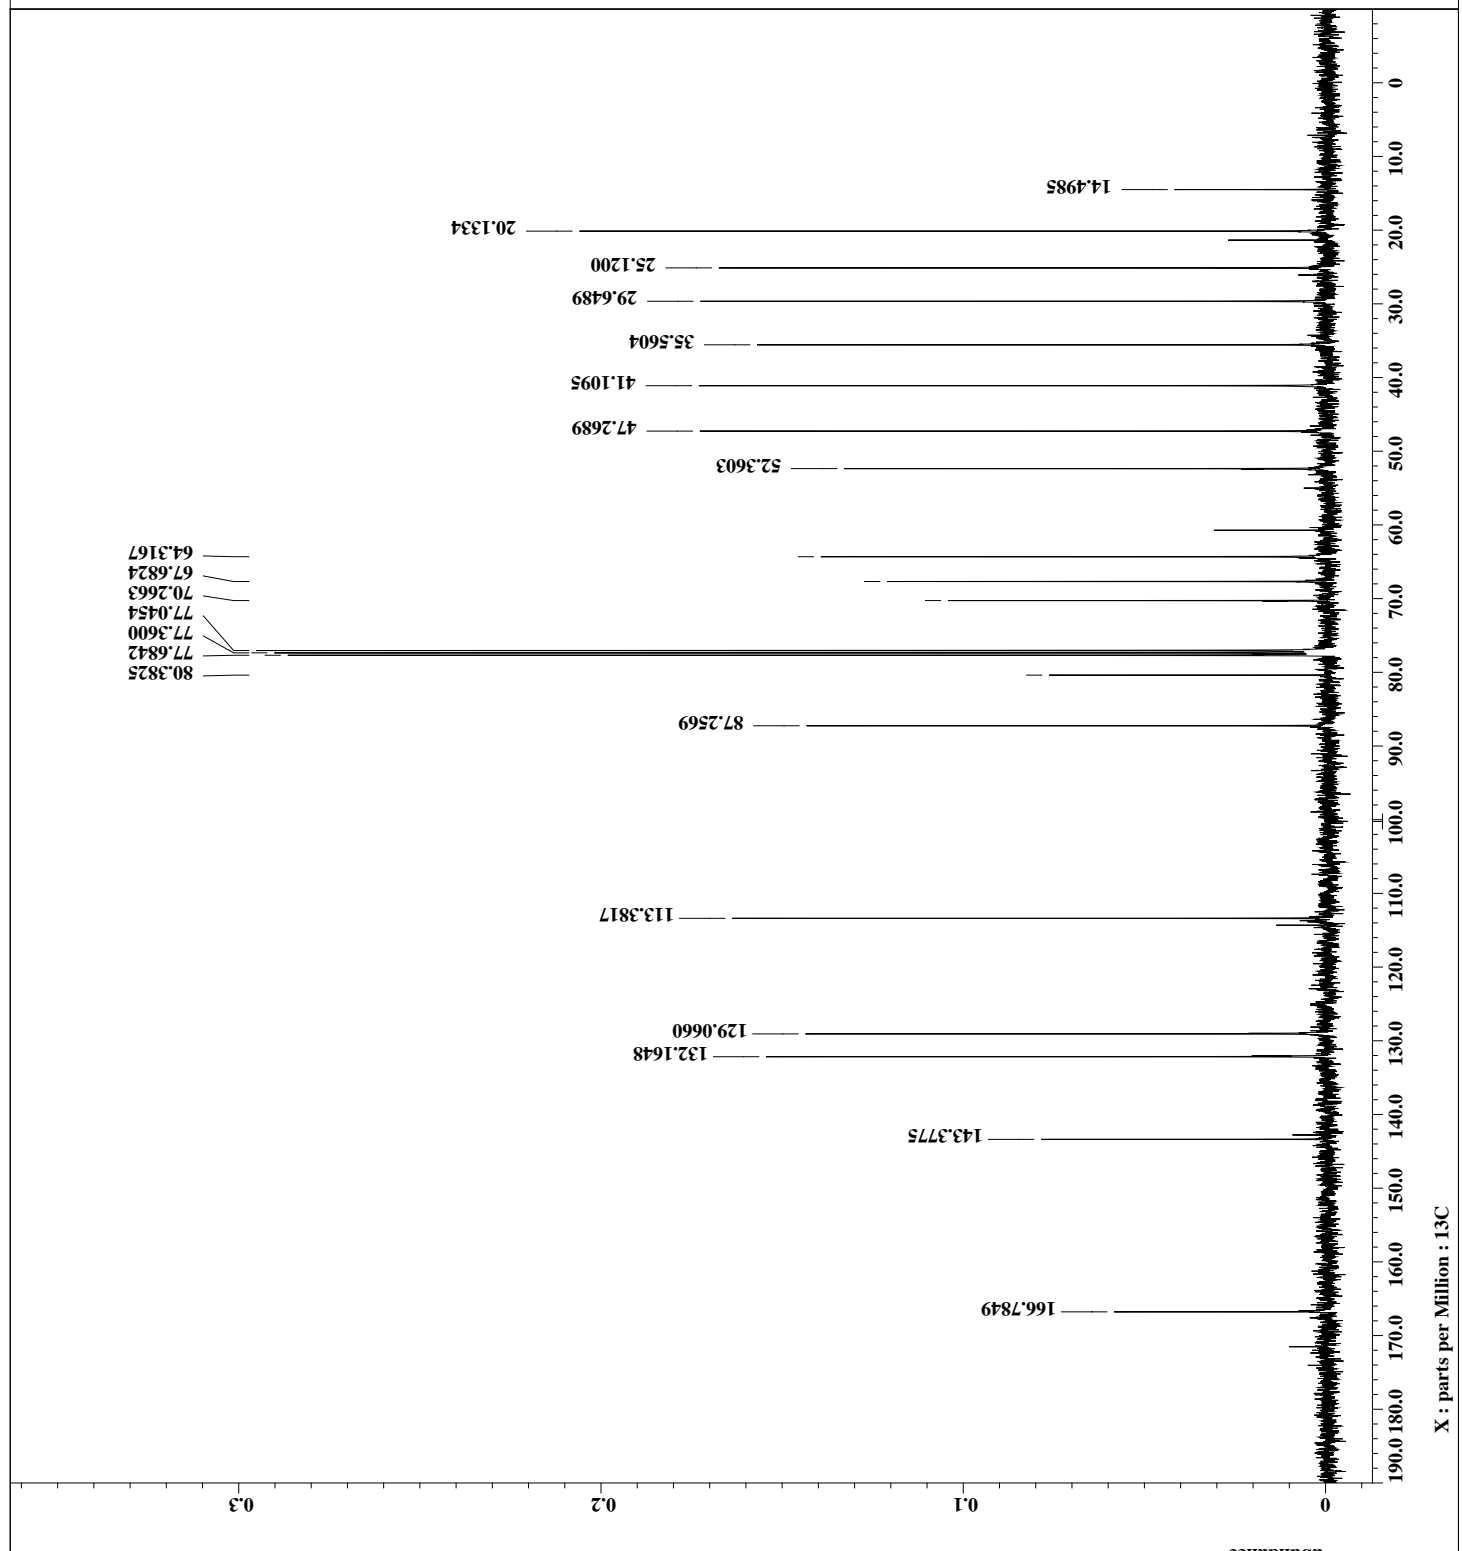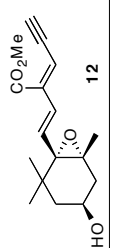

X : parts per Million : 13C



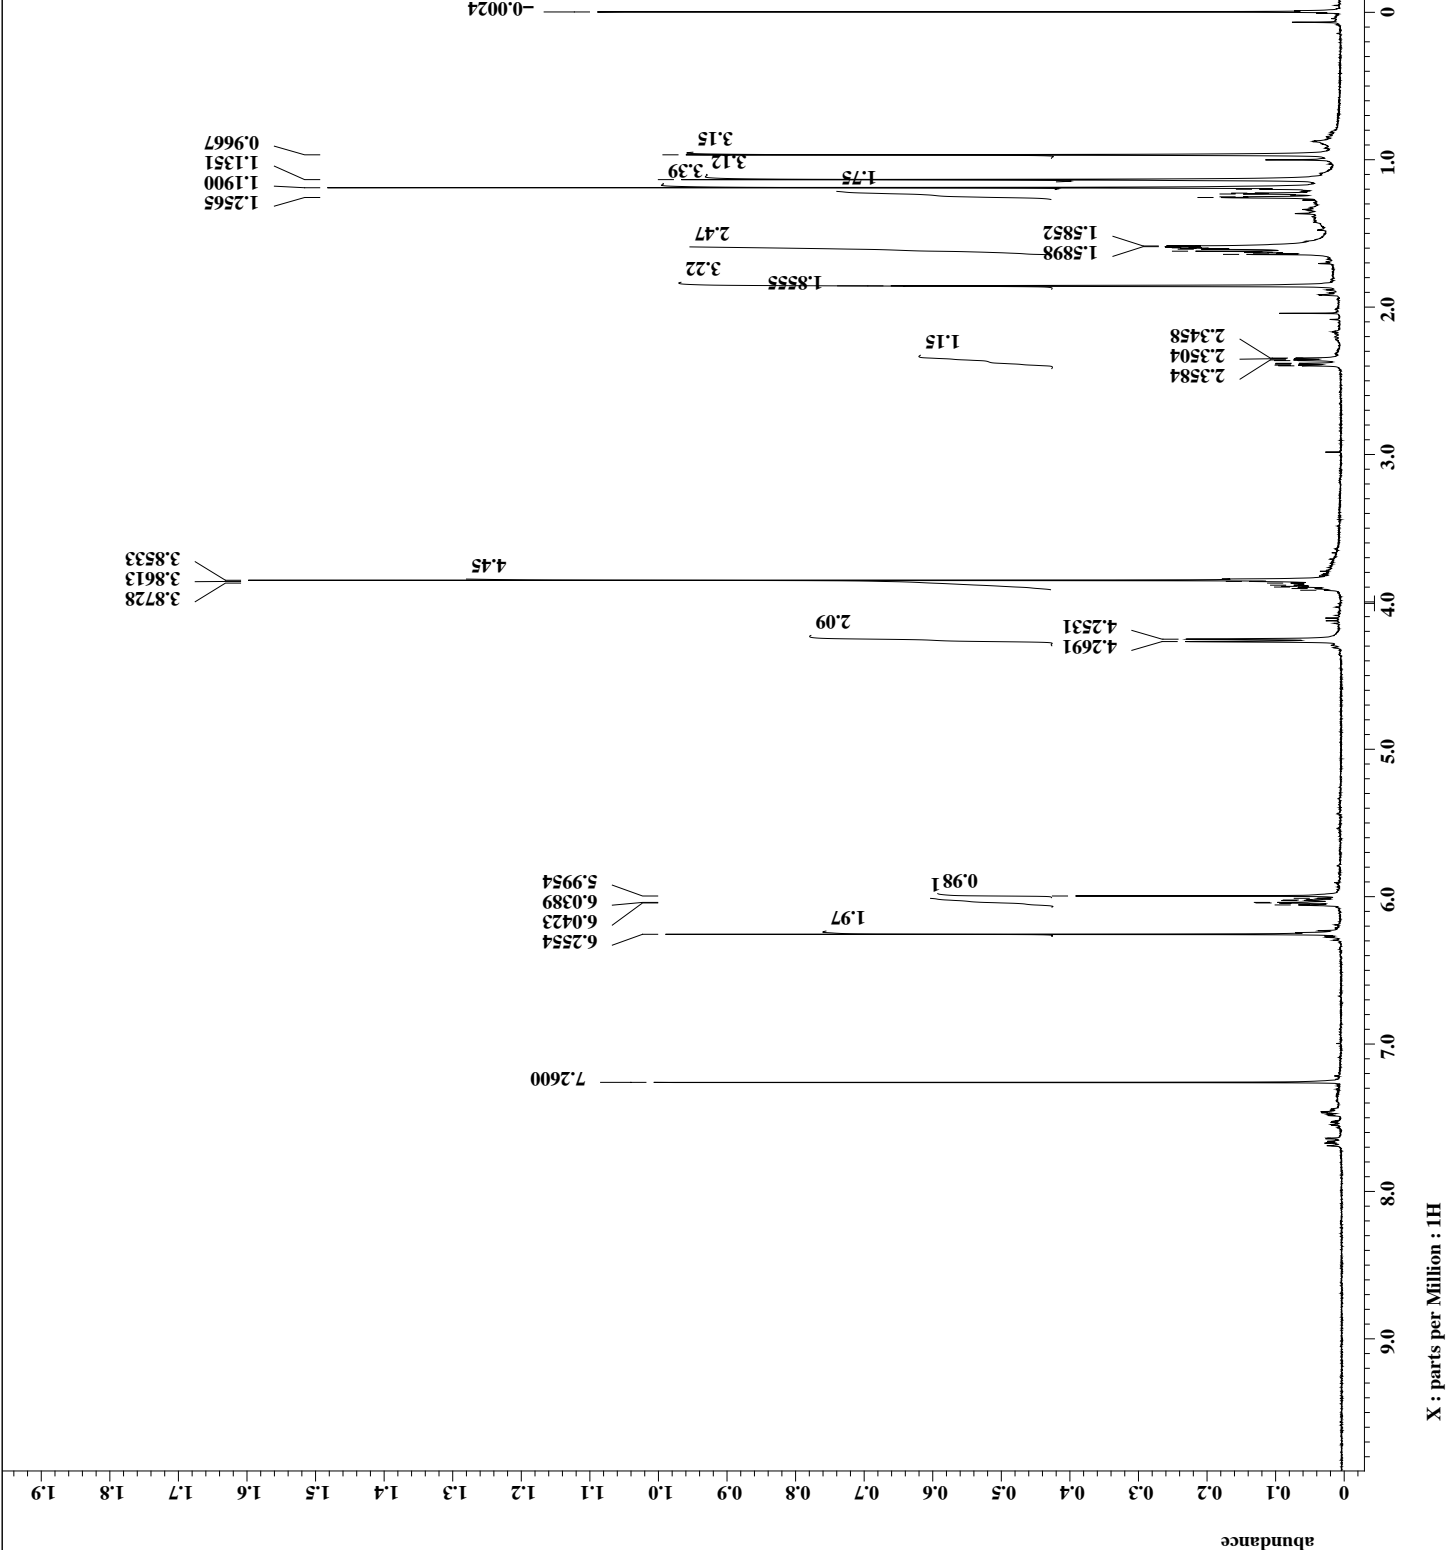

```

Filename = a2-alcohol-ester-1H-4
Author = delta
Experiment = single_pulse.ex2
Sample_id = 1
Solvent = CHLOROFORM-D
Creation_time = 5-DEC-2009 11:32:21
Revision_time = 12-DEC-2009 14:36:43
Current_time = 12-DEC-2009 14:38:08

Comment = single_pulse
Data_format = ID COMPLEX
Dim_size = 13107
Dim_title = 1H
Dim_units = [ppm]
Dimensions = X
Site = ECX400M
Spectrometer = DELTA2_NMR

Field_strength = 9.389766[T] (400[MHz])
x_acq_duration = 2.18365952[s]
x_domain = 1H
x_freq = 399.78219838[MHz]
x_offset = 4[ppm]
x_points = 16384
x_prescans = 1
x_resolution = 0.45794685[Hz]
x_sweep = 7.5030012[KHz]
Irr_domain = 1H
Irr_freq = 399.78219838[MHz]
Irr_offset = 5[ppm]
Tri_domain = 1H
Tri_freq = 399.78219838[MHz]
Tri_offset = 5[ppm]
Clipped = FALSE
Mod_return = 1
Scans = 8
Total_scans = 8

x_90_width = 10.5[us]
x_acq_time = 2.18365952[s]
x_angle = 45[deg]
x_atn = 1.4[dB]
x_pulse = 5.25[us]
Irr_mode = Off
Tri_mode = Off
Dante_preset = FALSE
Initial_wait = 1[s]
Recvr_gain = 38
Relaxation_delay = 1[s]
Repetition_time = 3.18365952[s]
Temp_get = 25.6[dC]

```

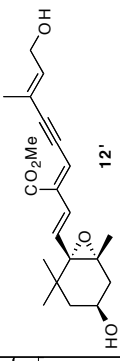

X : parts per Million : 1H

abundance

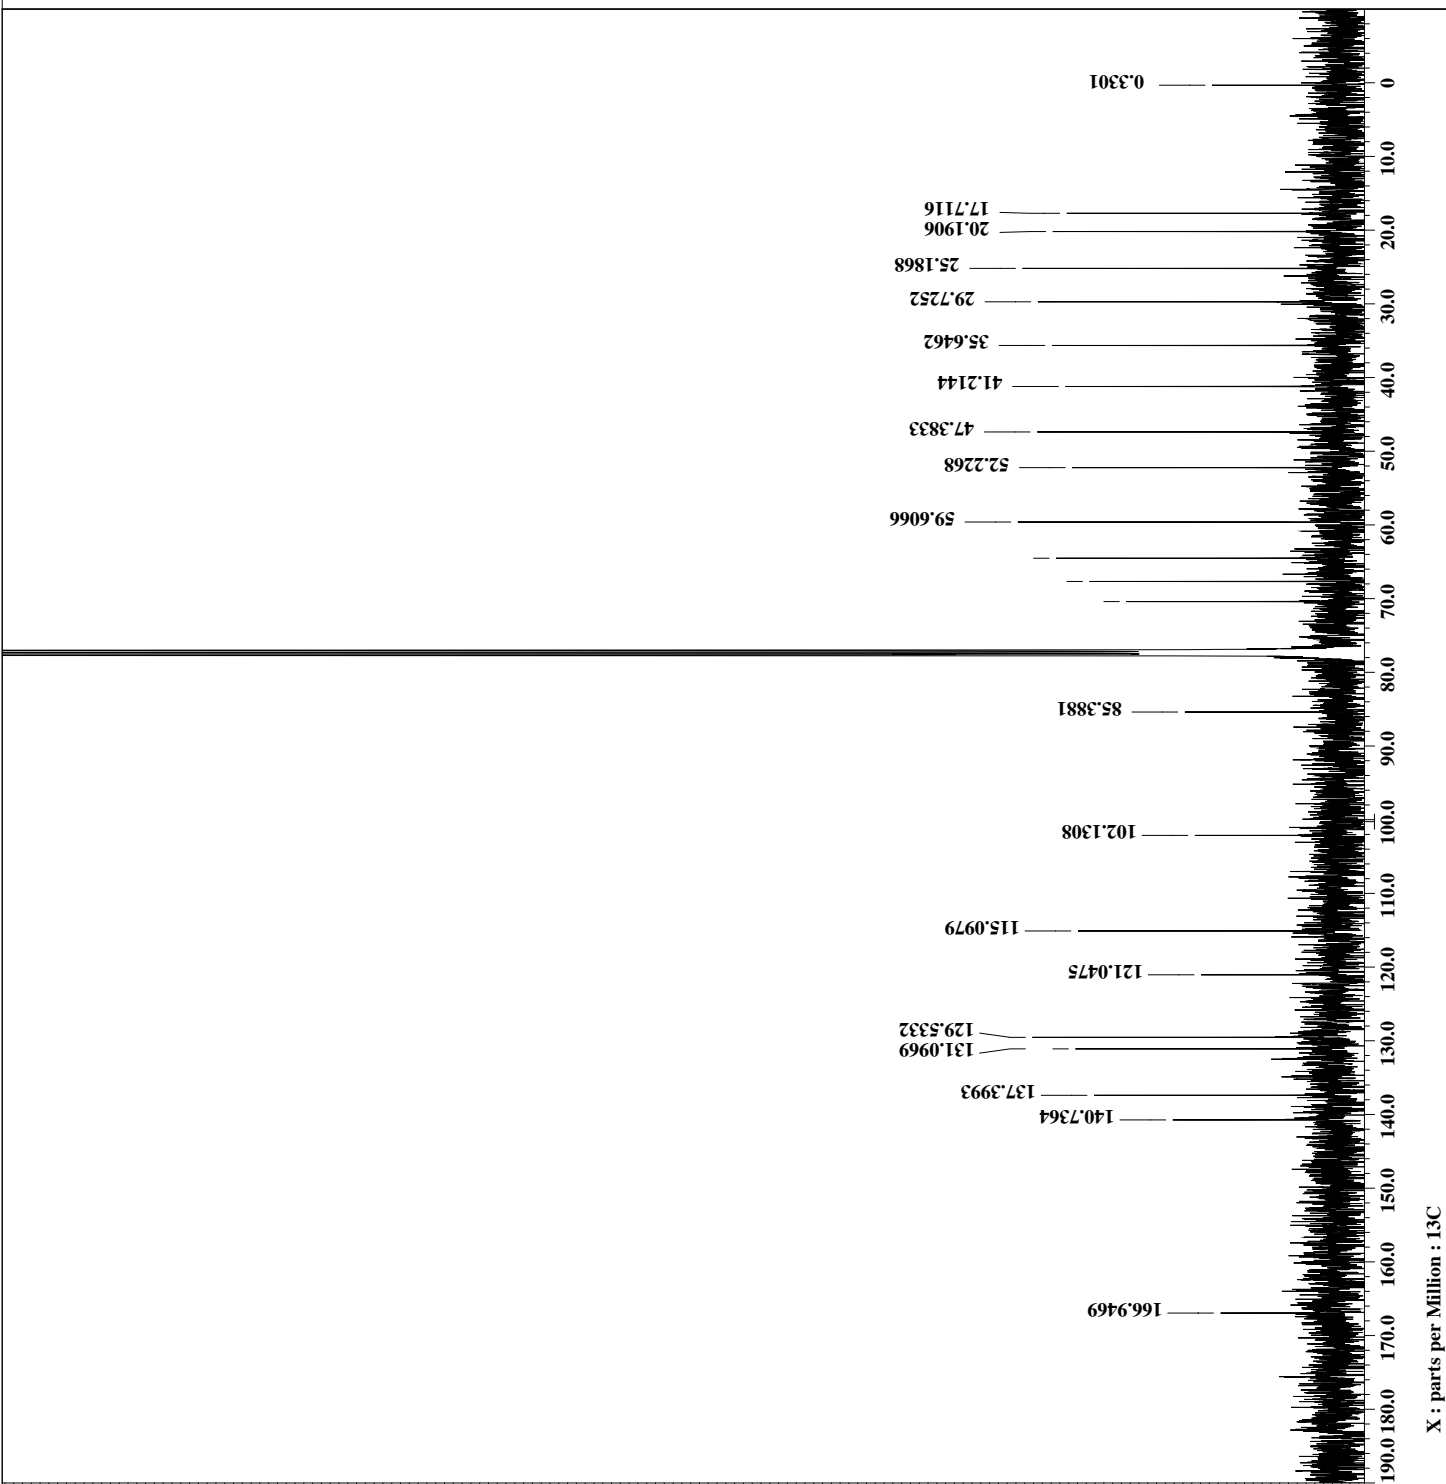

X : parts per Million : 13C

```

Filename = a2-alcohol-ester-13C-
Author = delta
Experiment = single_pulse_dec
Sample_id = S#456123
Solvent = CHLOROFORM-D
Creation_time = 5-DEC-2009 12:34:50
Revision_time = 12-DEC-2009 18:14:14
Current_time = 12-DEC-2009 18:15:05

Comment = single pulse decouple
Data_format = ID COMPLEX
Dim_size = 26214
Dim_title = 13C
Dim_units = [ppm]
Dimensions = X
Site = ECX400M
Spectrometer = DELTA2_NMR

Field_strength = 9.389766[T] (400[MHz])
X_acq_duration = 1.04333312[s]
X_domain = 13C
X_freq = 100.52530333[MHz]
X_offset = 100[ppm]
X_points = 32768
X_prescans = 4
X_resolution = 0.95846665[Hz]
X_sweep = 31.40703518[kHz]
Irr_domain = 1H
Irr_freq = 399.78219838[MHz]
Irr_offset = 5[ppm]
Clipped = TRUE
Mod_return = 1
Scans = 584
Total_scans = 584

X_90_width = 9.2[us]
X_acq_time = 1.04333312[s]
X_angle = 45[deg]
X_atn = 6.6[db]
X_pulse = 4.6[us]
Irr_atn_dec = 22.2[db]
Irr_atn_noe = 22.2[db]
Irr_noise = WAITZ
Decoupling = TRUE
Initial_wait = 1[s]
Noe = TRUE
Noe_time = 5[s]
Recvr_gain = 58
Relaxation_delay = 5[s]
Repetition_time = 6.04333312[s]
Temp_get = 26.2[dc]

```

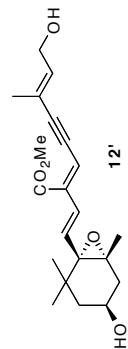



katsum750\_03.1000.1  
 Iridinin Derivative 15E-A-2 /CDCI3 /298K(TE=300.5)  
 C{1H} 1Pulse with CPD (zpgp30):CPTCI-Z

202.563  
 202.544  
 170.400  
 166.638  
 135.857  
 132.692  
 132.678  
 131.287  
 130.315  
 128.013  
 118.066  
 117.708  
 117.597  
 115.396  
 103.272  
 87.617  
 81.021  
 77.404  
 77.374  
 77.353  
 77.322  
 77.307  
 77.178  
 77.009  
 76.839  
 76.729  
 76.692  
 72.682  
 70.131  
 67.947  
 67.674  
 64.214  
 51.802  
 51.578  
 47.648  
 47.086  
 46.598  
 45.411  
 45.221  
 40.909  
 35.784  
 35.346  
 33.743  
 32.059  
 31.930  
 31.275  
 29.708  
 29.686  
 29.666  
 29.412  
 29.173  
 28.931  
 28.917  
 28.677

Current Data Parameters  
 NAME katsum750\_03  
 EXPNO 1000  
 PROCNO 1

F2 - Acquisition Parameters  
 Date\_ 20070724

Time 5.52  
 INSTRUM Spect  
 PROBHD 5 mm CPTCI 1H-  
 PULPROG zpgp30  
 TD 65536  
 SOLVENT CDCl3  
 NS 4096  
 DS 4  
 SWH 45045.047 Hz  
 FIDRES 0.687333 Hz  
 AQ 0.7274996 sec  
 RG 4096  
 DW 11.100 usec  
 DE 6.00 usec  
 TE 300.0 K  
 D1 2.00000000 sec  
 d11 0.03000000 sec  
 DELTA 1.89999998 sec  
 MCREST 0.00000000 sec  
 MCWRK 0.01500000 sec

=====  
 CHANNEL f1  
 NUC1 13C  
 P1 15.00 usec  
 PL1 -4.90 dB  
 SFO1 188.632006 MHz

=====  
 CHANNEL f2  
 waltz16  
 CPDPRG2 1H  
 NUC2 13C  
 PCPD2 100.00 usec  
 PL2 120.00 dB  
 PL12 16.80 GB  
 PL13 16.80 GB  
 SFO2 750.1330005 MHz

F2 - Processing parameters  
 SI 32768  
 SF 188.6203390 MHz  
 EM  
 WDW 0  
 SSB 0  
 LB 1.00 Hz  
 GB 0  
 PC 0.00

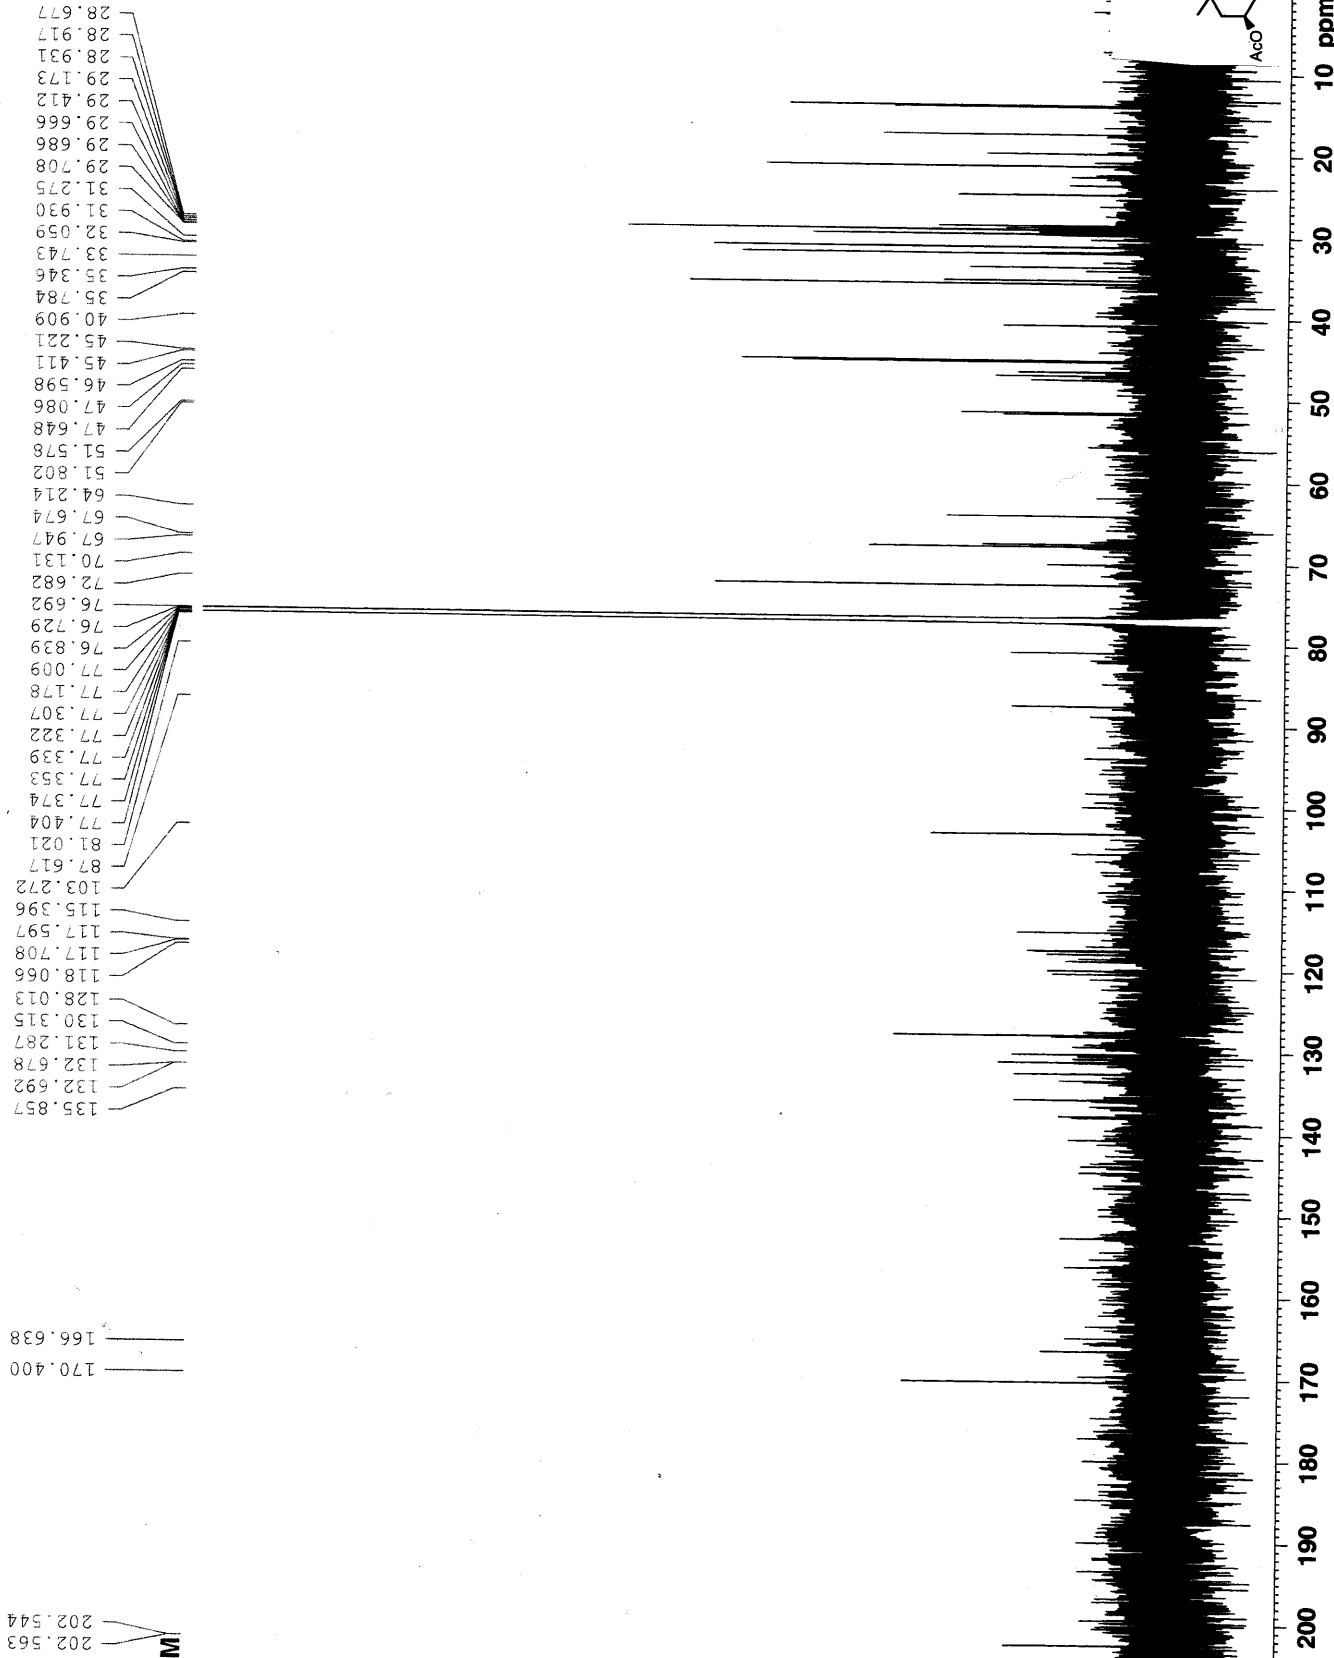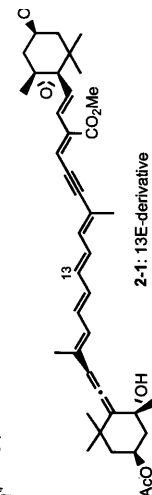

iridinin Derivative 15Z-A-2 /CDC13 /298K(TE=300.5)  
 | 1Pulse (zg30):CPTCI-Z

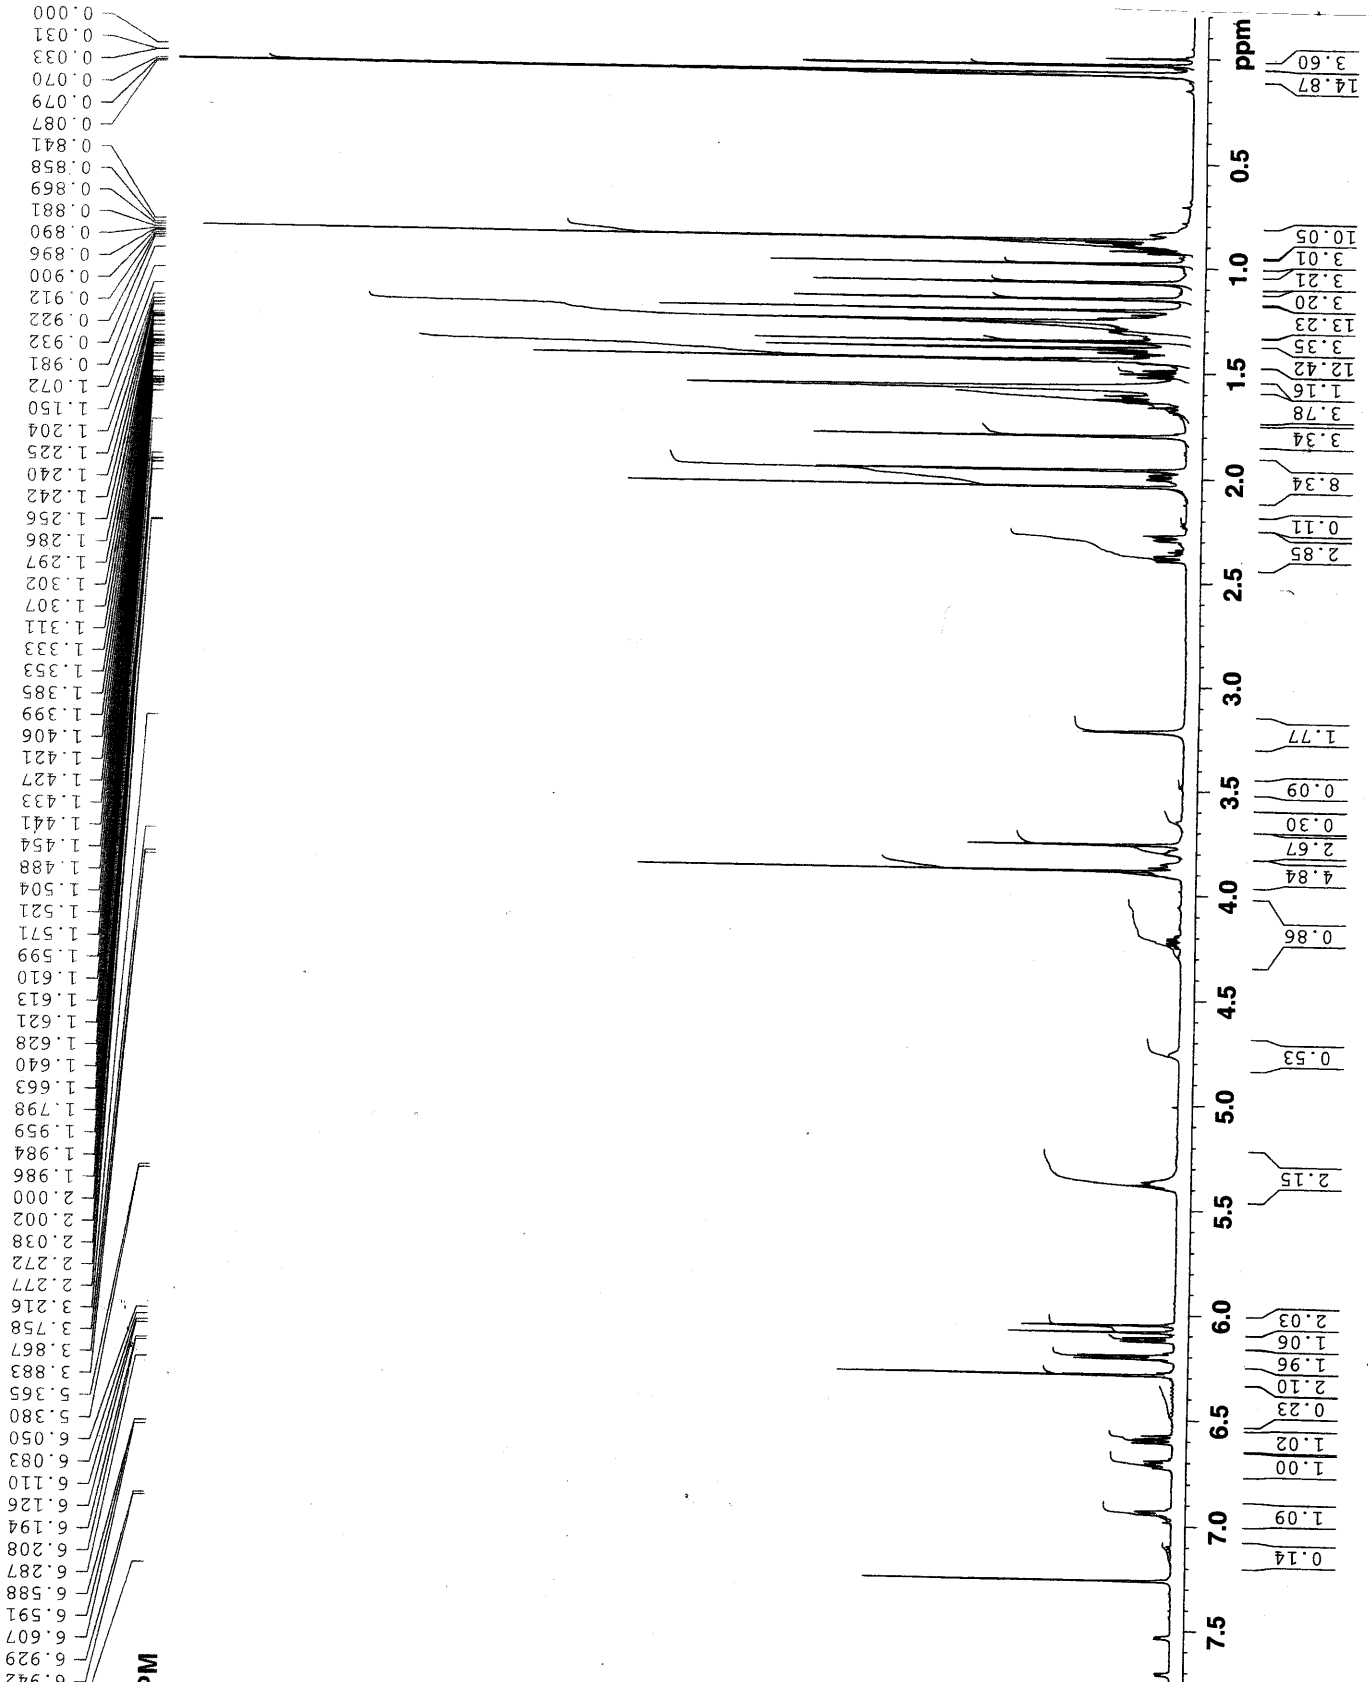

Current Data Parameters  
 NAME Katsum750\_04  
 EXPNO 1  
 PROCNO 1

F2 - Acquisition Parameters  
 Date\_ 20070724  
 Time 14.43  
 INSTRUM spect  
 PROBHD 5 mm CPTCI 1H-  
 PULPROG zg30  
 TD 65536  
 SOLVENT CDC13  
 NS 16  
 DS 4  
 SMH 11261.262 Hz  
 FIDRES 0.171833 Hz  
 AQ 2.9098485 sec  
 RG 64  
 DW 44.400 usec  
 DE 6.00 usec  
 TE 300.0 K  
 D1 1.0000000 sec  
 MCREST 0.0000000 sec  
 MCWRK 0.0150000 sec

==== CHANNEL f1 =====  
 NUC1 1H  
 P1 10.00 usec  
 PL1 -3.00 dB  
 SFO1 750.1336006 MHz

F2 - Processing parameters  
 SI 32768  
 SF 750.1300165 MHz  
 WDW EM  
 SSB 0  
 LB 0.30 Hz  
 GB 0  
 PC 0.10

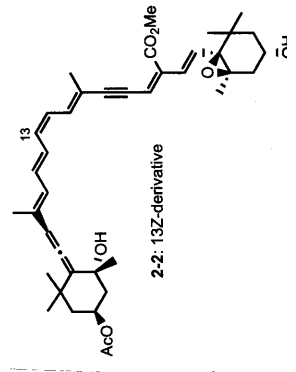

Peridinin Derivative 15Z-A-2 /CDC13 /298K(TE=300.5)  
 13C{1H} 1Pulse with CPD (zgpg30):CPTCI-Z

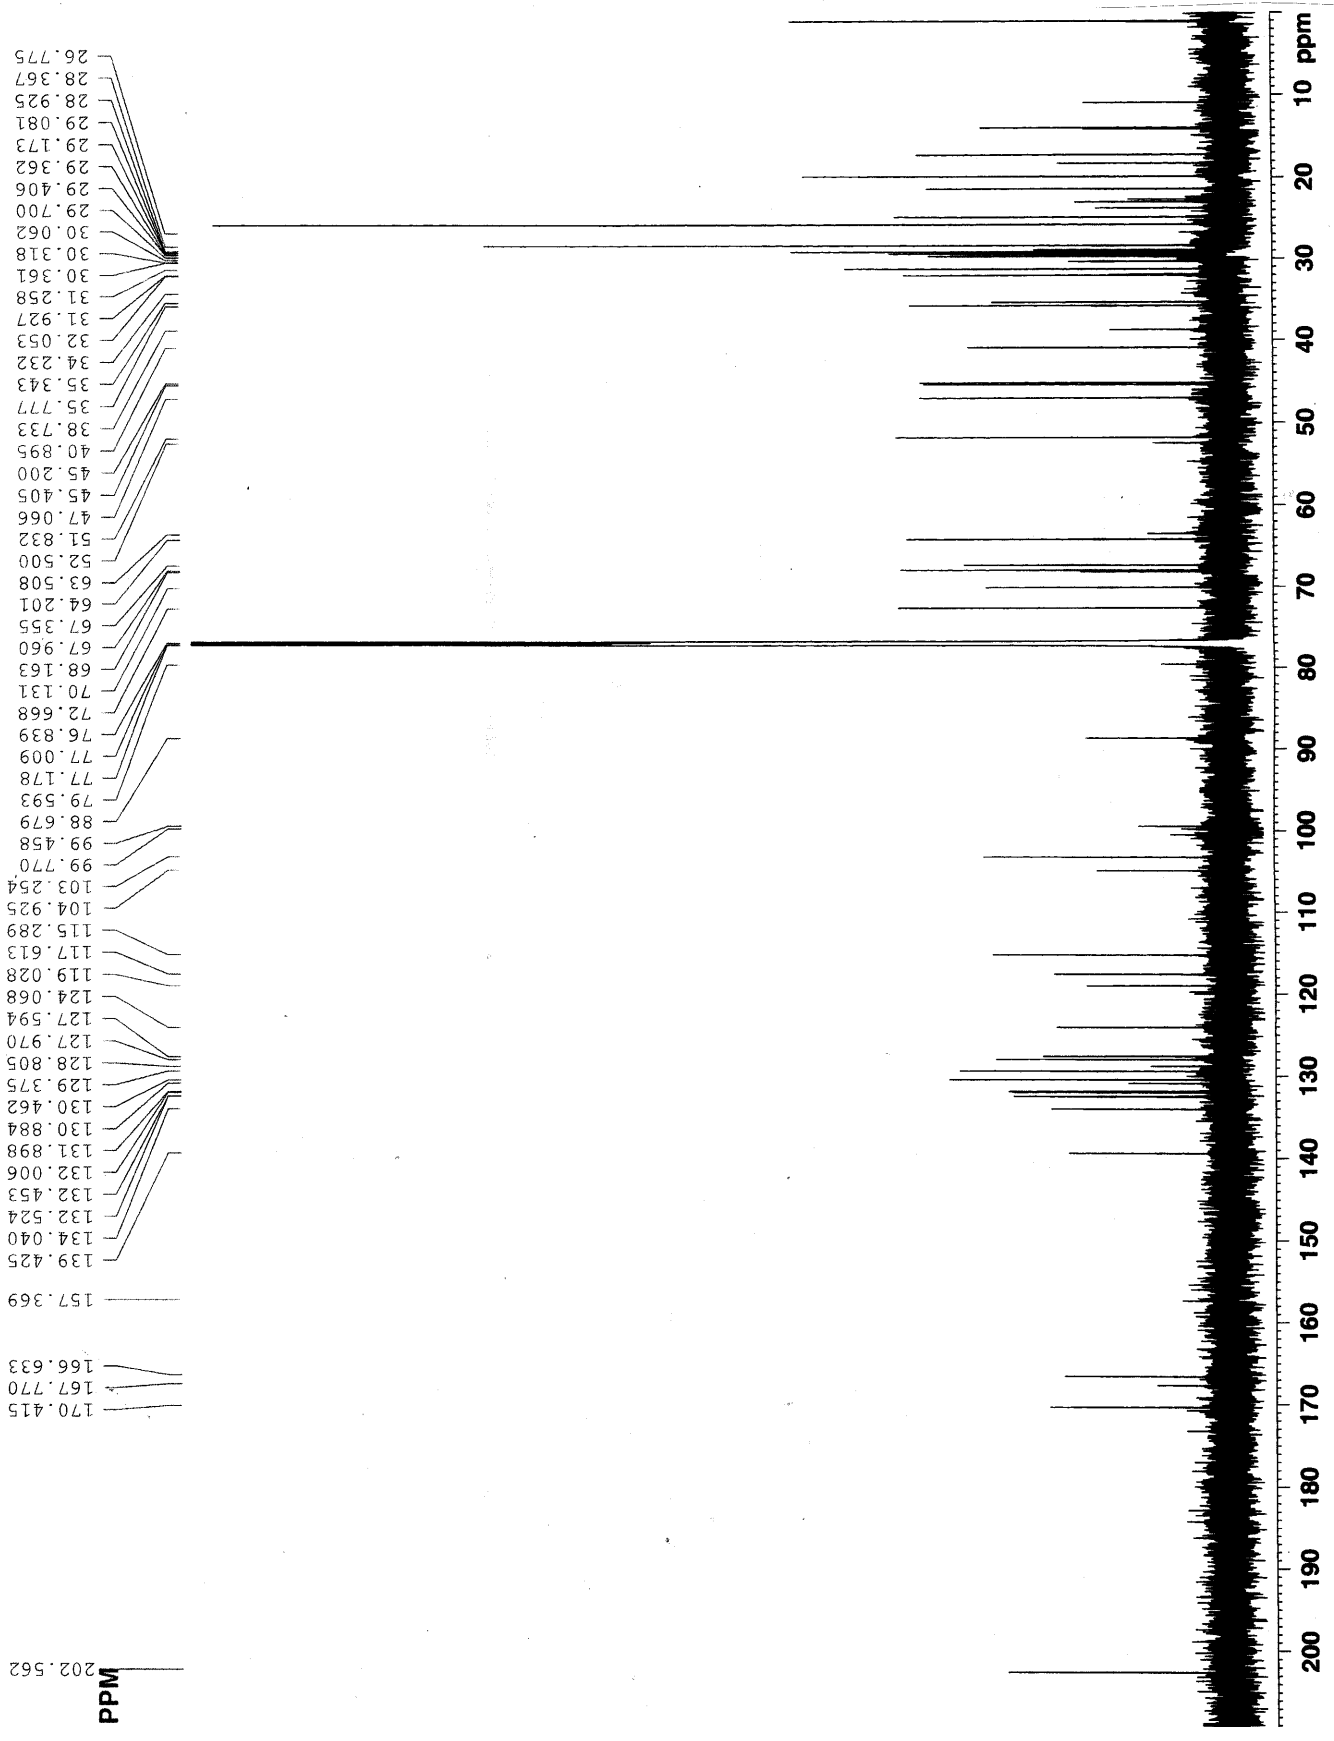

Current Data Parameters  
 NAME katsu750\_04  
 EXPNO 1000  
 PROCNO 1

F2 - Acquisition Parameters  
 Date\_ 20070725  
 Time 2.51  
 INSTRUM spect  
 PROBHD 5 mm CPTCI 1H-  
 PULPROG zgpg30  
 TD 65536  
 SOLVENT CDC13  
 NS 4096  
 DS 4  
 SWH 45045.047 Hz  
 FIDRES 0.687333 Hz  
 AQ 0.727496 sec  
 RG 16384  
 DW 11.100 usec  
 DE 6.00 usec  
 TE 300.0 K  
 D1 2.00000000 sec  
 d11 0.03000000 sec  
 DELTA 1.89999998 sec  
 MCREST 0.00000000 sec  
 MCWRK 0.01500000 sec

==== CHANNEL f1 =====  
 NUC1 13C  
 P1 15.00 usec  
 PL1 -4.30 dB  
 SFO1 188.6392006 MHz

==== CHANNEL f2 =====  
 CPDPRG2 waltz16  
 NUC2 1H  
 PCPD2 100.00 usec  
 PL2 120.00 dB  
 PL12 16.80 dB  
 PL13 16.80 dB  
 SFO2 750.1330005 MHz

F2 - Processing parameters  
 SI 32768  
 SF 188.6203403 MHz  
 EM  
 WDW 0  
 SSB 1.00 Hz  
 LB 0  
 GB 0  
 PC 1.00

```

Filename = a3-cis-bromide-1H-4.j
Author = delta
Experiment = single_pulse.ex2
Sample_id = 1
Solvent = CHLOROFORM-D
Creation_time = 7-DEC-2009 20:19:01
Revision_time = 12-DEC-2009 14:48:06
Current_time = 12-DEC-2009 14:48:39

Comment = single_pulse
Data_format = ID COMPLEX
Dim_size = 13107
Dim_title = 1H
Dim_units = [ppm]
Dimensions = X
Site = ECX400M
Spectrometer = DELTA2_NMR

Field_strength = 9.389766[T] (400[MHz])
x_acq_duration = 2.18365952[s]
x_domain = 1H
x_freq = 399.78219838[MHz]
x_offset = 4[ppm]
x_points = 16384
x_prescans = 1
x_resolution = 0.45794685[Hz]
x_sweep = 7.5030012[KHz]
Irr_domain = 1H
Irr_freq = 399.78219838[MHz]
Irr_offset = 5[ppm]
Tri_domain = 1H
Tri_freq = 399.78219838[MHz]
Tri_offset = 5[ppm]
Clipped = FALSE
Mod_return = 1
Scans = 8
Total_scans = 8

x_90_width = 10.5[us]
x_acq_time = 2.18365952[s]
x_angle = 45[deg]
x_atn = 1.4[dB]
x_pulse = 5.25[us]
Irr_mode = Off
Tri_mode = Off
Dante_preset = FALSE
Initial_wait = 1[s]
Recvr_gain = 30
Relaxation_delay = 1[s]
Repetition_time = 3.18365952[s]
Temp_get = 24[dc]

```

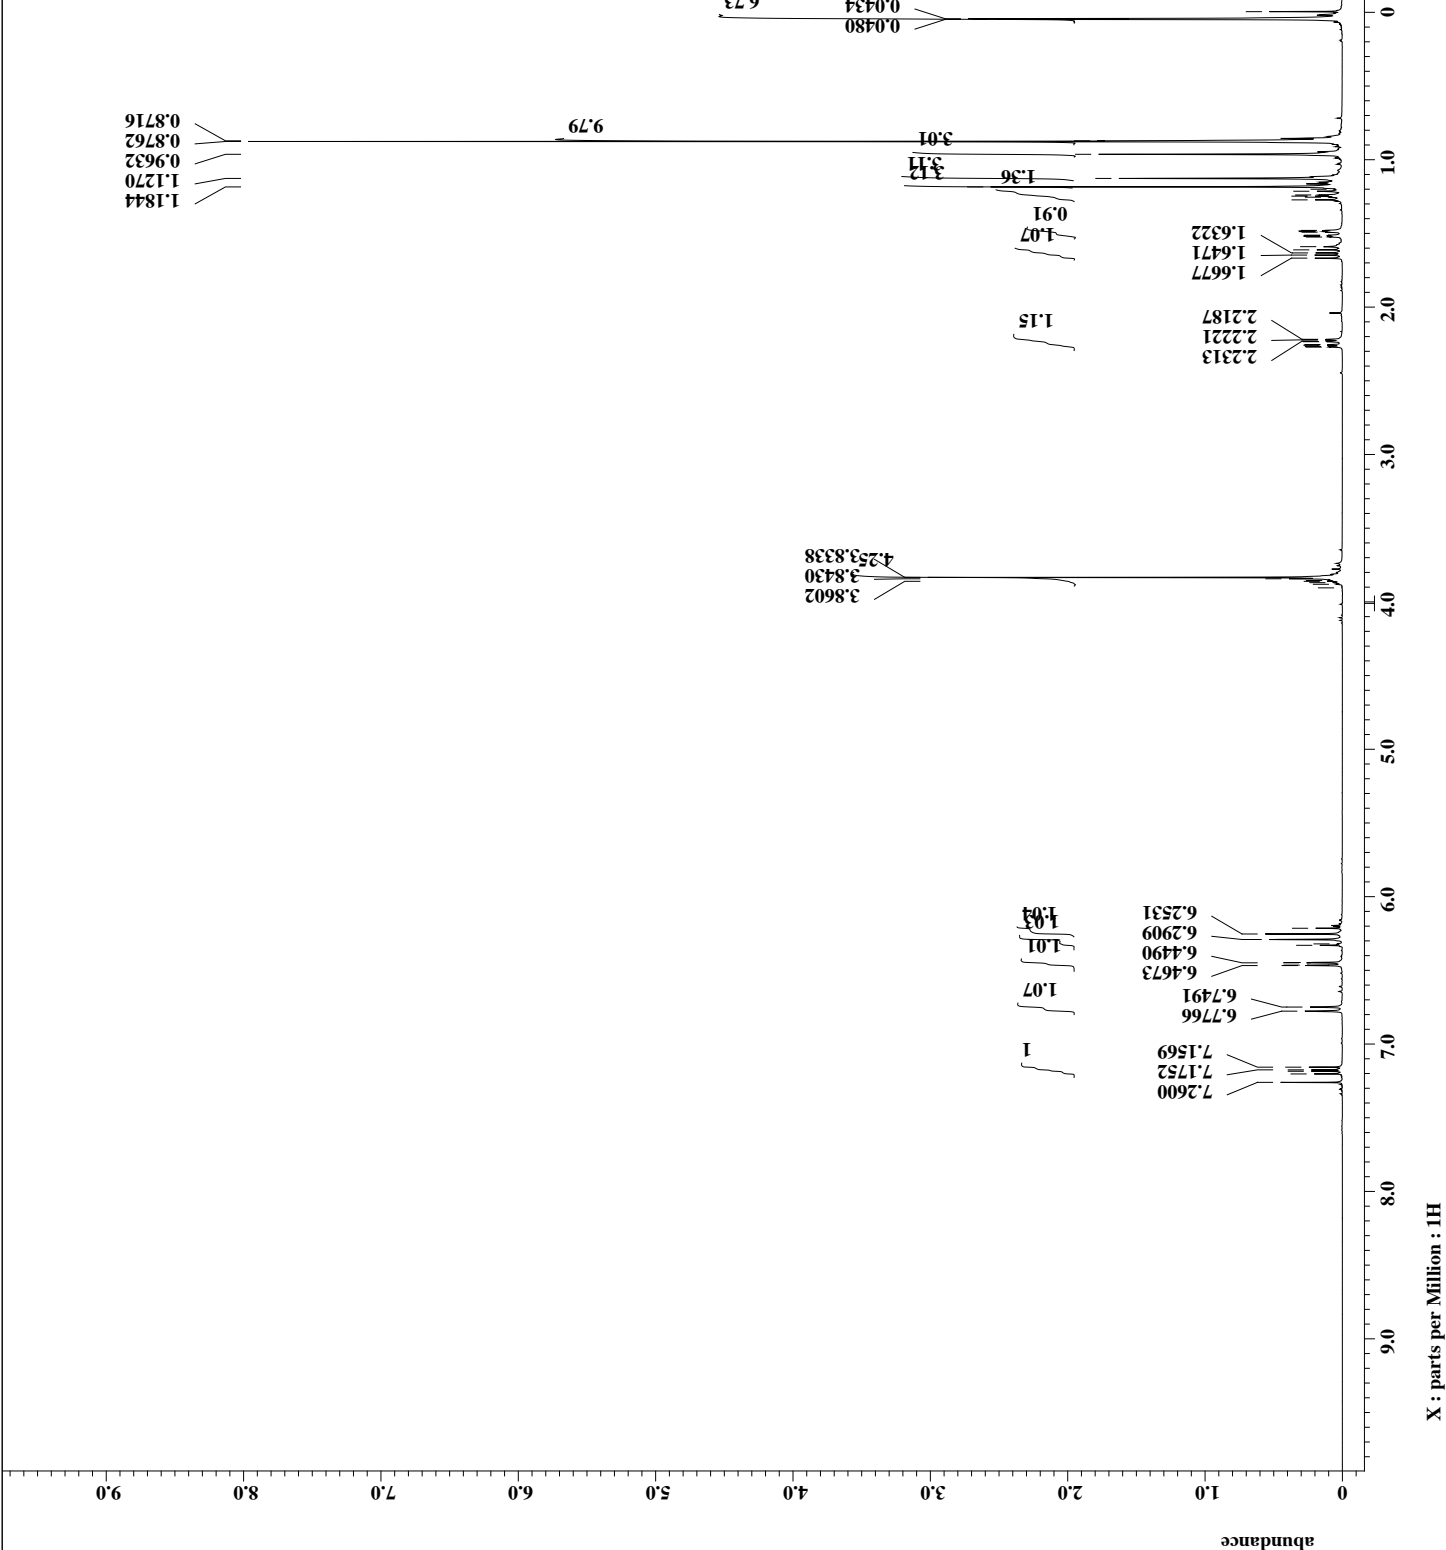

X : parts per Million : 1H

```

Filename = a3-cis-bromide-13C-3.
Author = delta
Experiment = single_pulse_dec
Sample_id = S#435638
Solvent = CHLOROFORM-D
Creation_time = 8-DEC-2009 11:22:43
Revision_time = 12-DEC-2009 18:17:33
Current_time = 12-DEC-2009 18:17:59

Comment = single pulse decouple
Data_format = ID COMPLEX
Dim_size = 26214
Dim_title = 13C
Dim_units = [ppm]
Dimensions = X
Site = ECX400M
Spectrometer = DELTA2_NMR

Field_strength = 9.389766[T] (400[MHz])
X_acq_duration = 1.04333312[s]
X_domain = 13C
X_freq = 100.52530333[MHz]
X_offset = 100[ppm]
X_points = 32768
X_prescans = 4
X_resolution = 0.95846665[Hz]
X_sweep = 31.40703518[kHz]
Irr_domain = 1H
Irr_freq = 399.78219838[MHz]
Irr_offset = 5[ppm]
Clipped = FALSE
Mod_return = 1
Scans = 213
Total_scans = 213

X_90_width = 9.2[us]
X_acq_time = 1.04333312[s]
X_angle = 45[deg]
X_atn = 6.6[db]
X_pulse = 4.6[us]
Irr_atn_dec = 22.2[db]
Irr_atn_noe = 22.2[db]
Irr_noise = WAITZ
Decoupling = TRUE
Initial_wait = 1[s]
Noe = TRUE
Noe_time = 5[s]
Recvr_gain = 52
Relaxation_delay = 5[s]
Repetition_time = 6.04333312[s]
Temp_get = 24.9[dc]

```

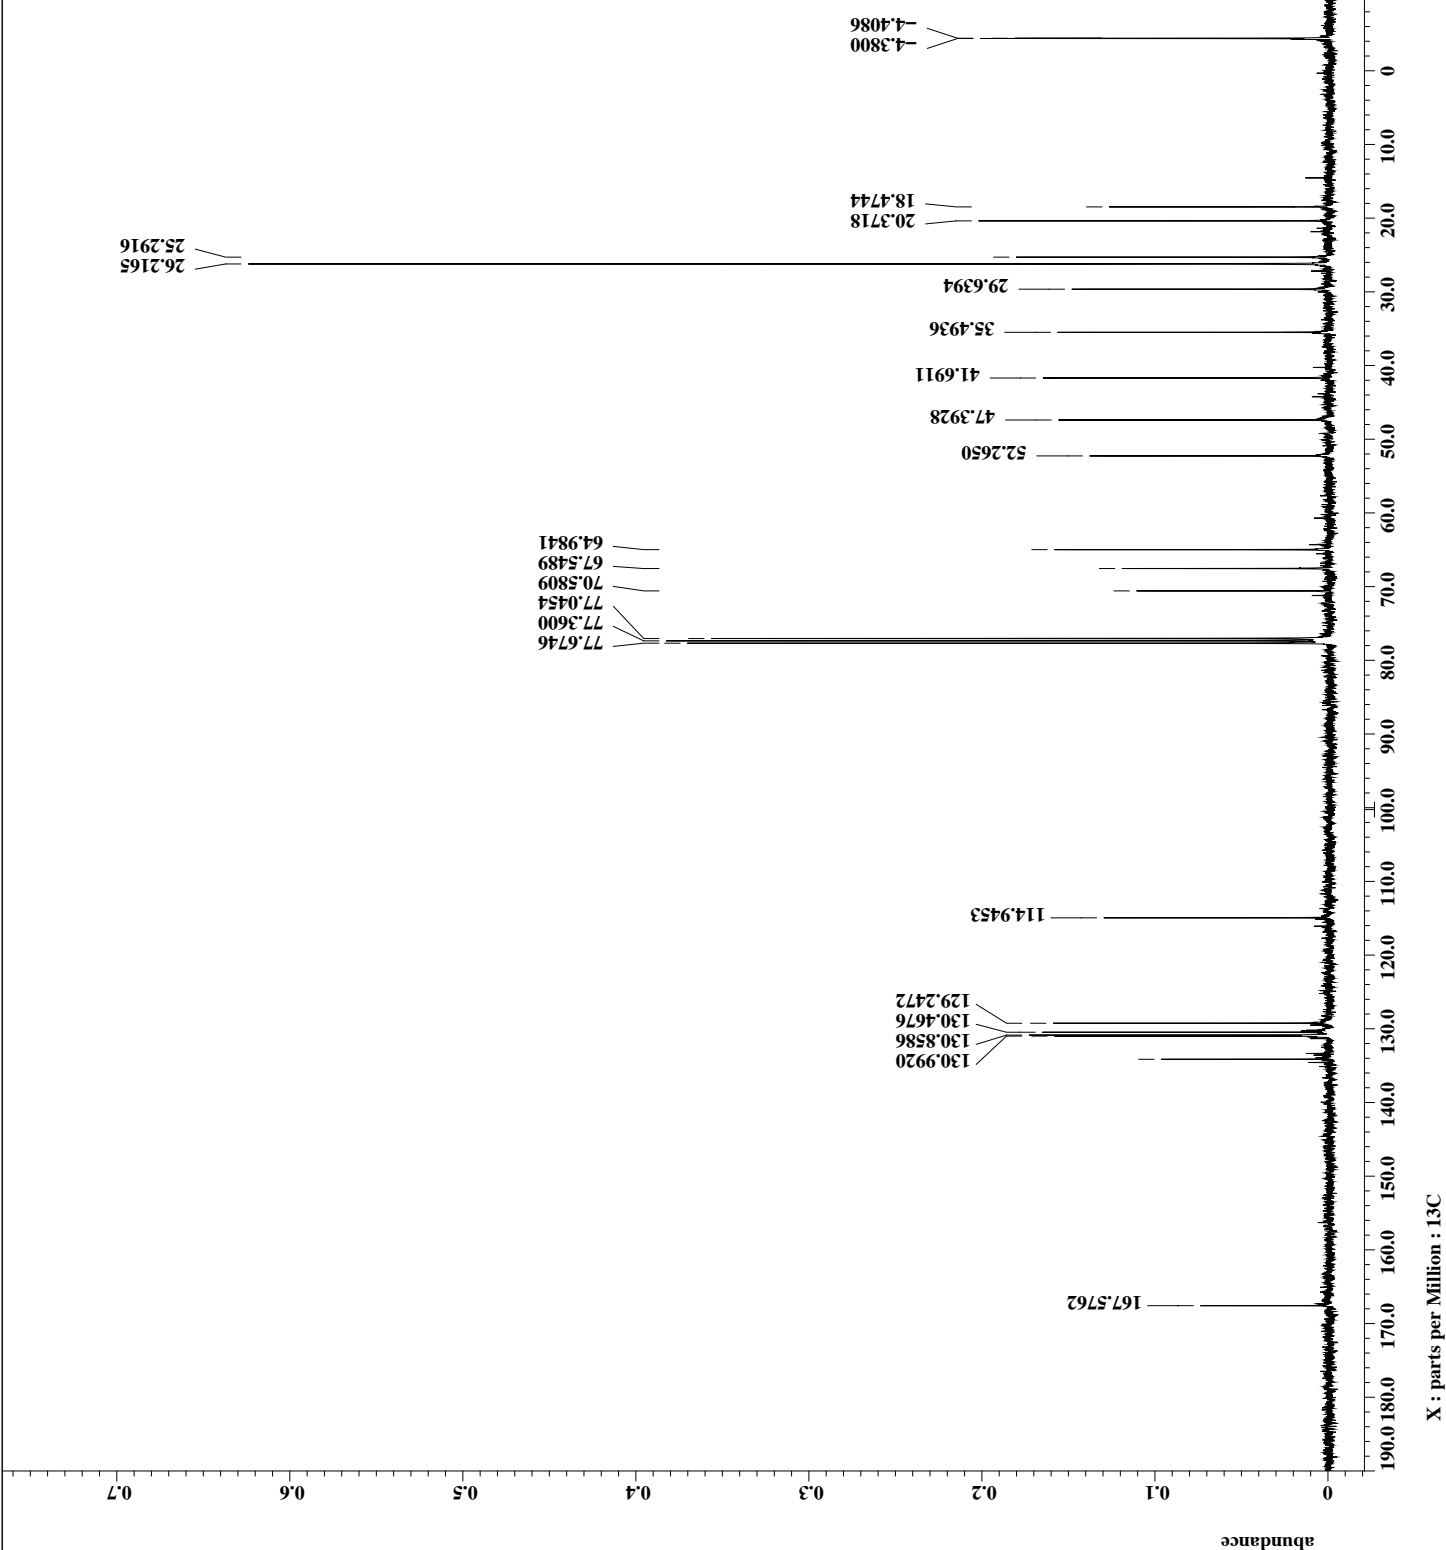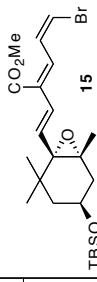

X : parts per Million : 13C





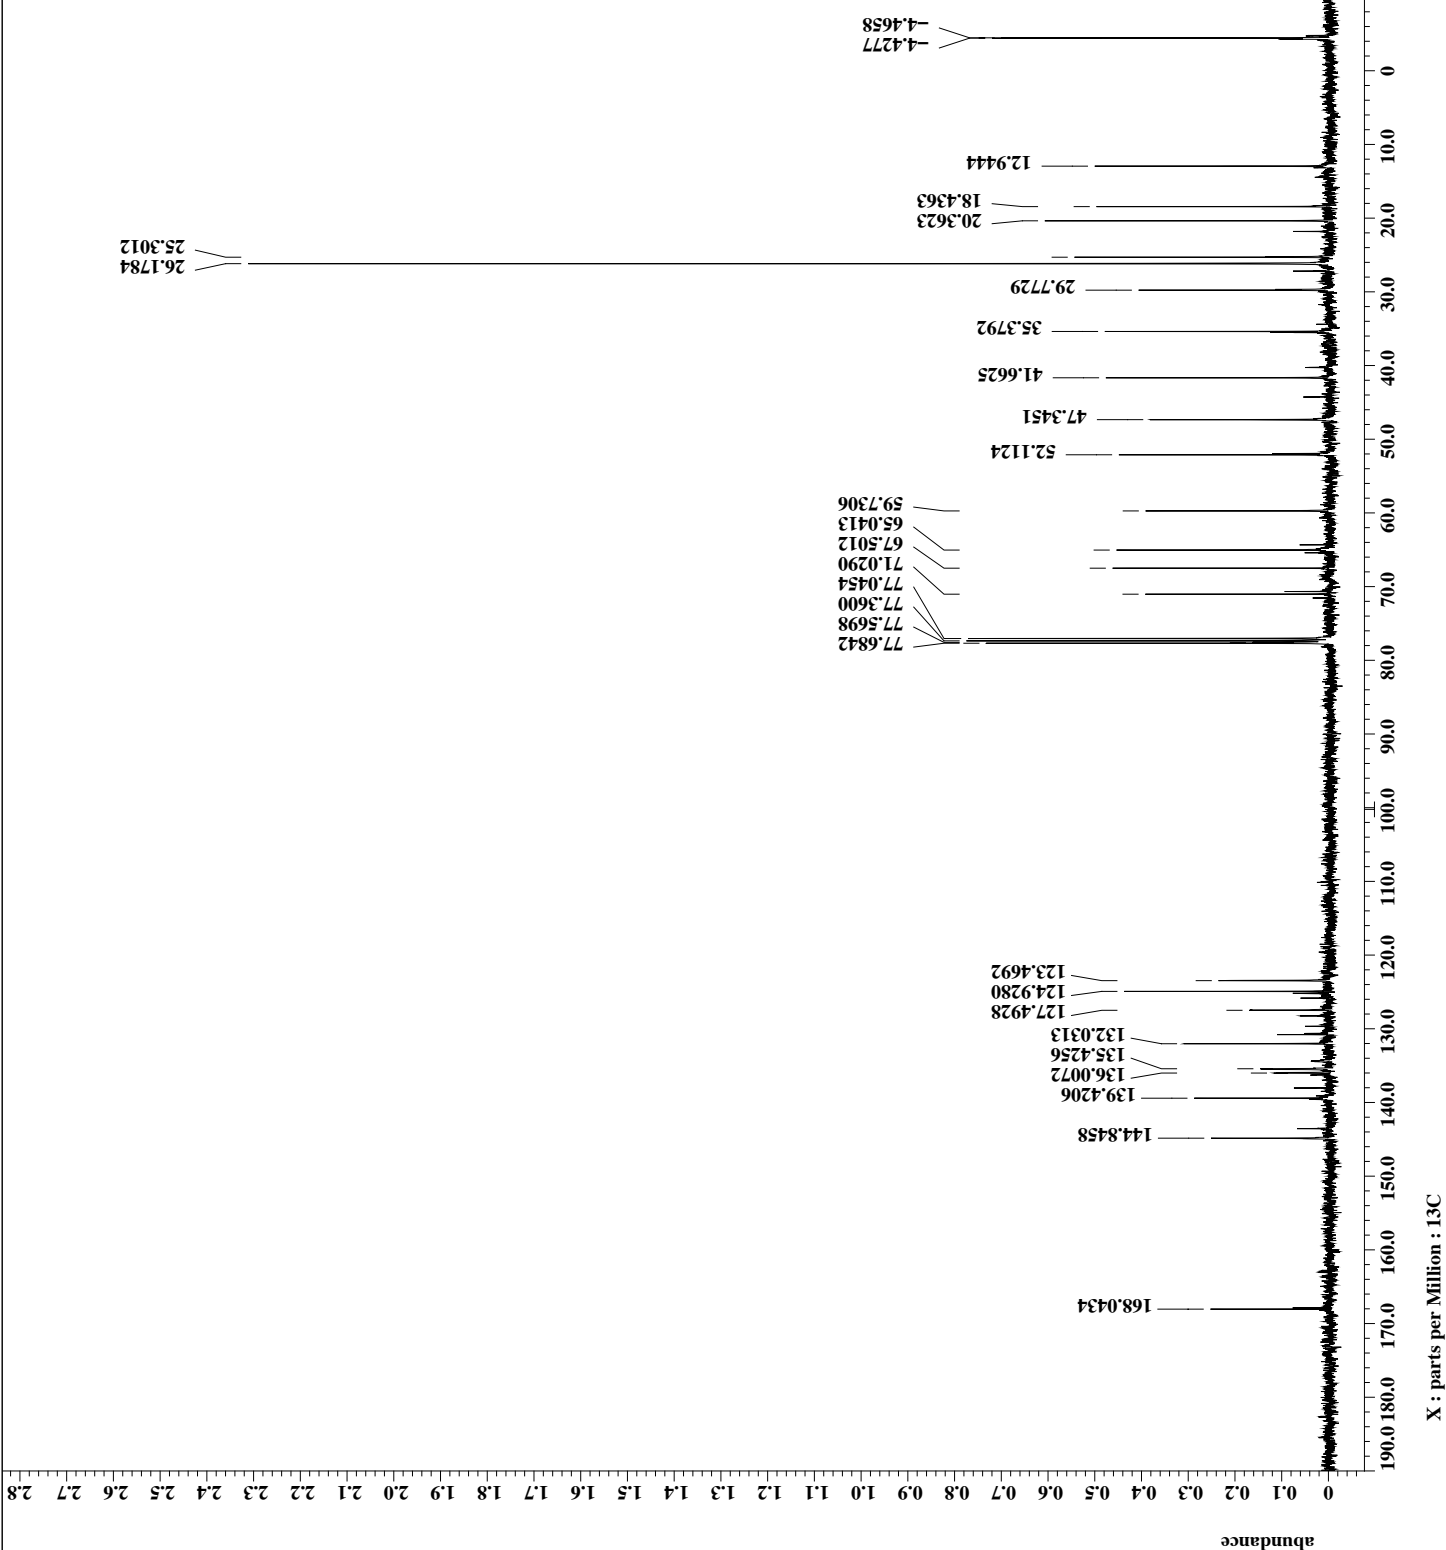

```

Filename = a3-tetraene-alcohol-1
Author = delta
Experiment = single_pulse_dec
Sample_id = S#705366
Solvent = CHLOROFORM-D
Creation_time = 8-DEC-2009 18:37:37
Revision_time = 12-DEC-2009 18:19:37
Current_time = 12-DEC-2009 18:20:13

Comment = single pulse decouple
Data_format = ID COMPLEX
Dim_size = 26214
Dim_title = 13C
Dim_units = [ppm]
Dimensions = X
Site = ECX400M
Spectrometer = DELTA2_NMR

Field_strength = 9.389766[T] (400[MHz])
X_acq_duration = 1.04333312[s]
X_domain = 13C
X_freq = 100.52530333[MHz]
X_offset = 100[ppm]
X_points = 32768
X_prescans = 4
X_resolution = 0.95846665[Hz]
X_sweep = 31.40703518[kHz]
Irr_domain = 1H
Irr_freq = 399.78219838[MHz]
Irr_offset = 5[ppm]
Clipped = TRUE
Mod_return = 1
Scans = 69
Total_scans = 69

X_90_width = 9.2[us]
X_acq_time = 1.04333312[s]
X_angle = 45[deg]
X_atn = 6.6[db]
X_pulse = 4.6[us]
Irr_atn_dec = 22.2[db]
Irr_atn_noe = 22.2[db]
Irr_noise = WAITZ
Decoupling = TRUE
Initial_wait = 1[s]
Noe = TRUE
Noe_time = 5[s]
Recvr_gain = 60
Relaxation_delay = 5[s]
Repetition_time = 6.04333312[s]
Temp_get = 24.9[dc]

```

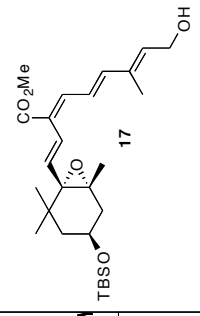



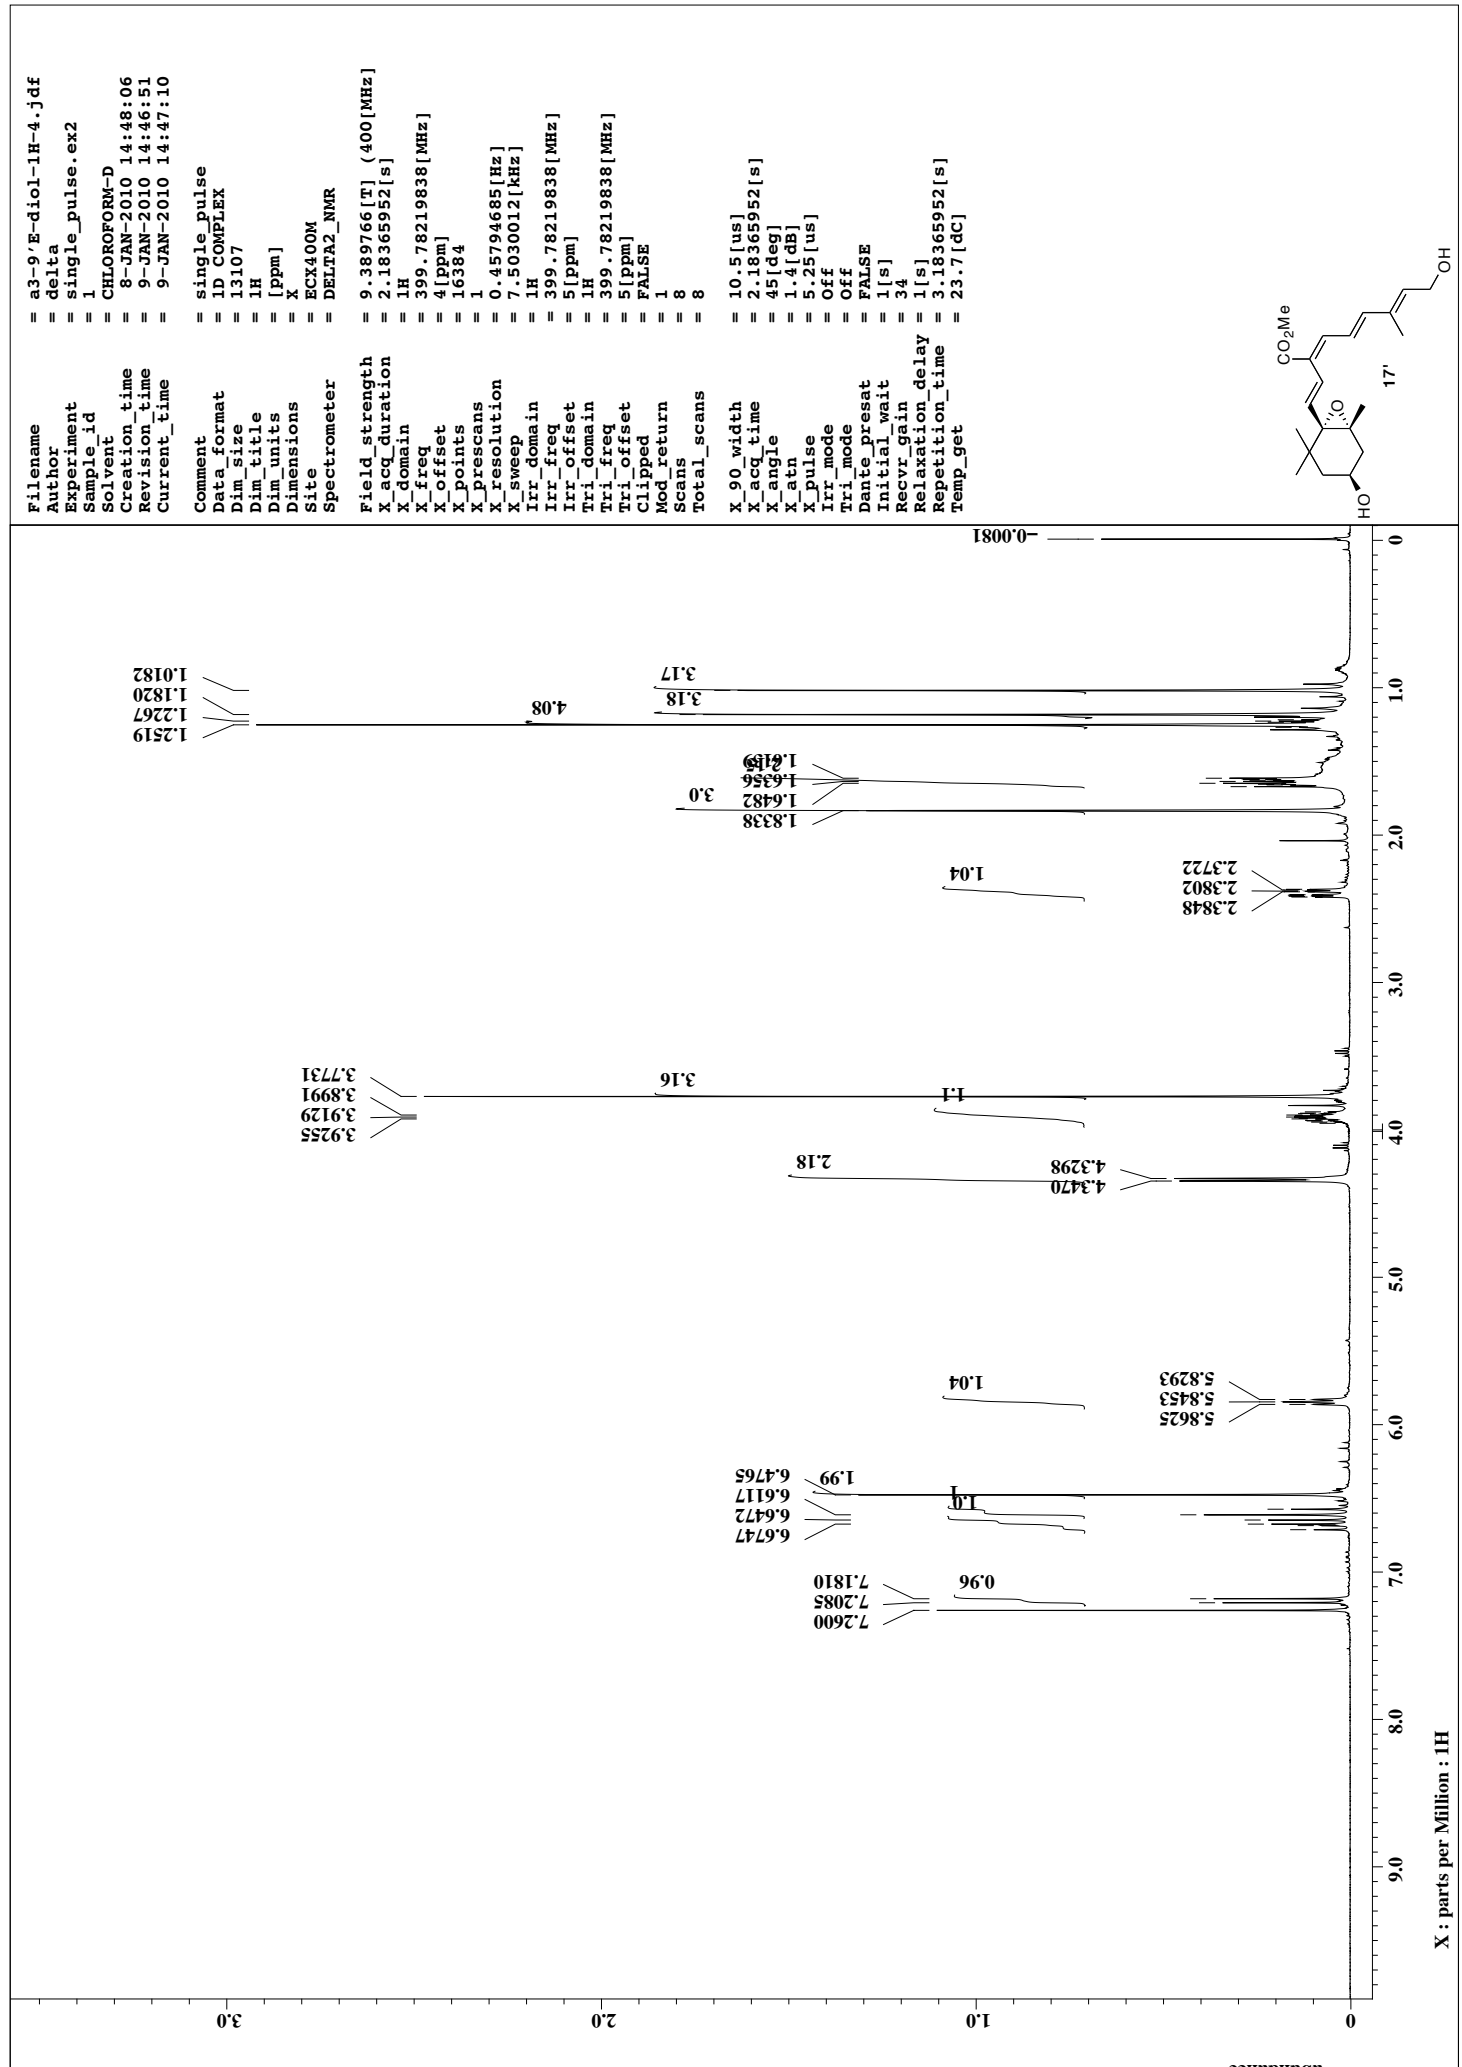

```

Filename = a3-9'E-diol-1H-4.jdf
Author = delta
Experiment = single_pulse.ex2
Sample_id = 1
Solvent = CHLOROFORM-D
Creation_time = 8-JAN-2010 14:48:06
Revision_time = 9-JAN-2010 14:46:51
Current_time = 9-JAN-2010 14:47:10

Comment = single_pulse
Data_format = ID COMPLEX
Dim_size = 13107
Dim_title = 1H
Dim_units = [ppm]
Dimensions = X
Site = ECX400M
Spectrometer = DELTA2_NMR

Field_strength = 9.389766[T] (400[MHz])
x_acq_duration = 2.18365952[s]
x_domain = 1H
x_freq = 399.78219838[MHz]
x_offset = 4[ppm]
x_points = 16384
x_prescans = 1
x_resolution = 0.45794685[Hz]
x_sweep = 7.5030012[KHz]
Irr_domain = 1H
Irr_freq = 399.78219838[MHz]
Irr_offset = 5[ppm]
Tri_domain = 1H
Tri_freq = 399.78219838[MHz]
Tri_offset = 5[ppm]
Clipped = FALSE
Mod_return = 1
Total_scans = 8

x_90_width = 10.5[us]
x_acq_time = 2.18365952[s]
x_angle = 45[deg]
x_atn = 1.4[dB]
x_pulse = 5.25[us]
Irr_mode = Off
Tri_mode = Off
Dante_presat = FALSE
Initial_wait = 1[s]
Recvr_gain = 34
Relaxation_delay = 1[s]
Repetition_time = 3.18365952[s]
Temp_get = 23.7[degC]

```

```

Filename = a3-9'E-diol-13C-3.jdf
Author = delta
Experiment = single_pulse_dec
Sample_id = S#581989
Solvent = CHLOROFORM-D
Creation_time = 8-JAN-2010 15:42:17
Revision_time = 9-JAN-2010 14:37:58
Current_time = 9-JAN-2010 14:40:01

Comment = single pulse decouple
Data_format = ID COMPLEX
Dim_size = 26214
Dim_title = 13C
Dim_units = [ppm]
Dimensions = X
Site = ECX400M
Spectrometer = DELTA2_NMR

Field_strength = 9.389766[T] (400[MHz])
X_acq_duration = 1.04333312[s]
X_domain = 13C
X_freq = 100.52530333[MHz]
X_offset = 100[ppm]
X_points = 32768
X_prescans = 4
X_resolution = 0.95846665[Hz]
X_sweep = 31.40703518[kHz]
Irr_domain = 1H
Irr_freq = 399.78219838[MHz]
Irr_offset = 5[ppm]
Clipped = FALSE
Mod_return = 1
Scans = 388
Total_scans = 388

X_90_width = 9.2[us]
X_acq_time = 1.04333312[s]
X_angle = 45[deg]
X_atn = 6.6[db]
X_pulse = 4.6[us]
Irr_atn_dec = 22.2[db]
Irr_atn_noe = 22.2[db]
Irr_noise = WAITZ
Decoupling = TRUE
Initial_wait = 1[s]
Noe = TRUE
Noe_time = 5[s]
Recvr_gain = 50
Relaxation_delay = 5[s]
Repetition_time = 6.04333312[s]
Temp_get = 23.4[dc]

```

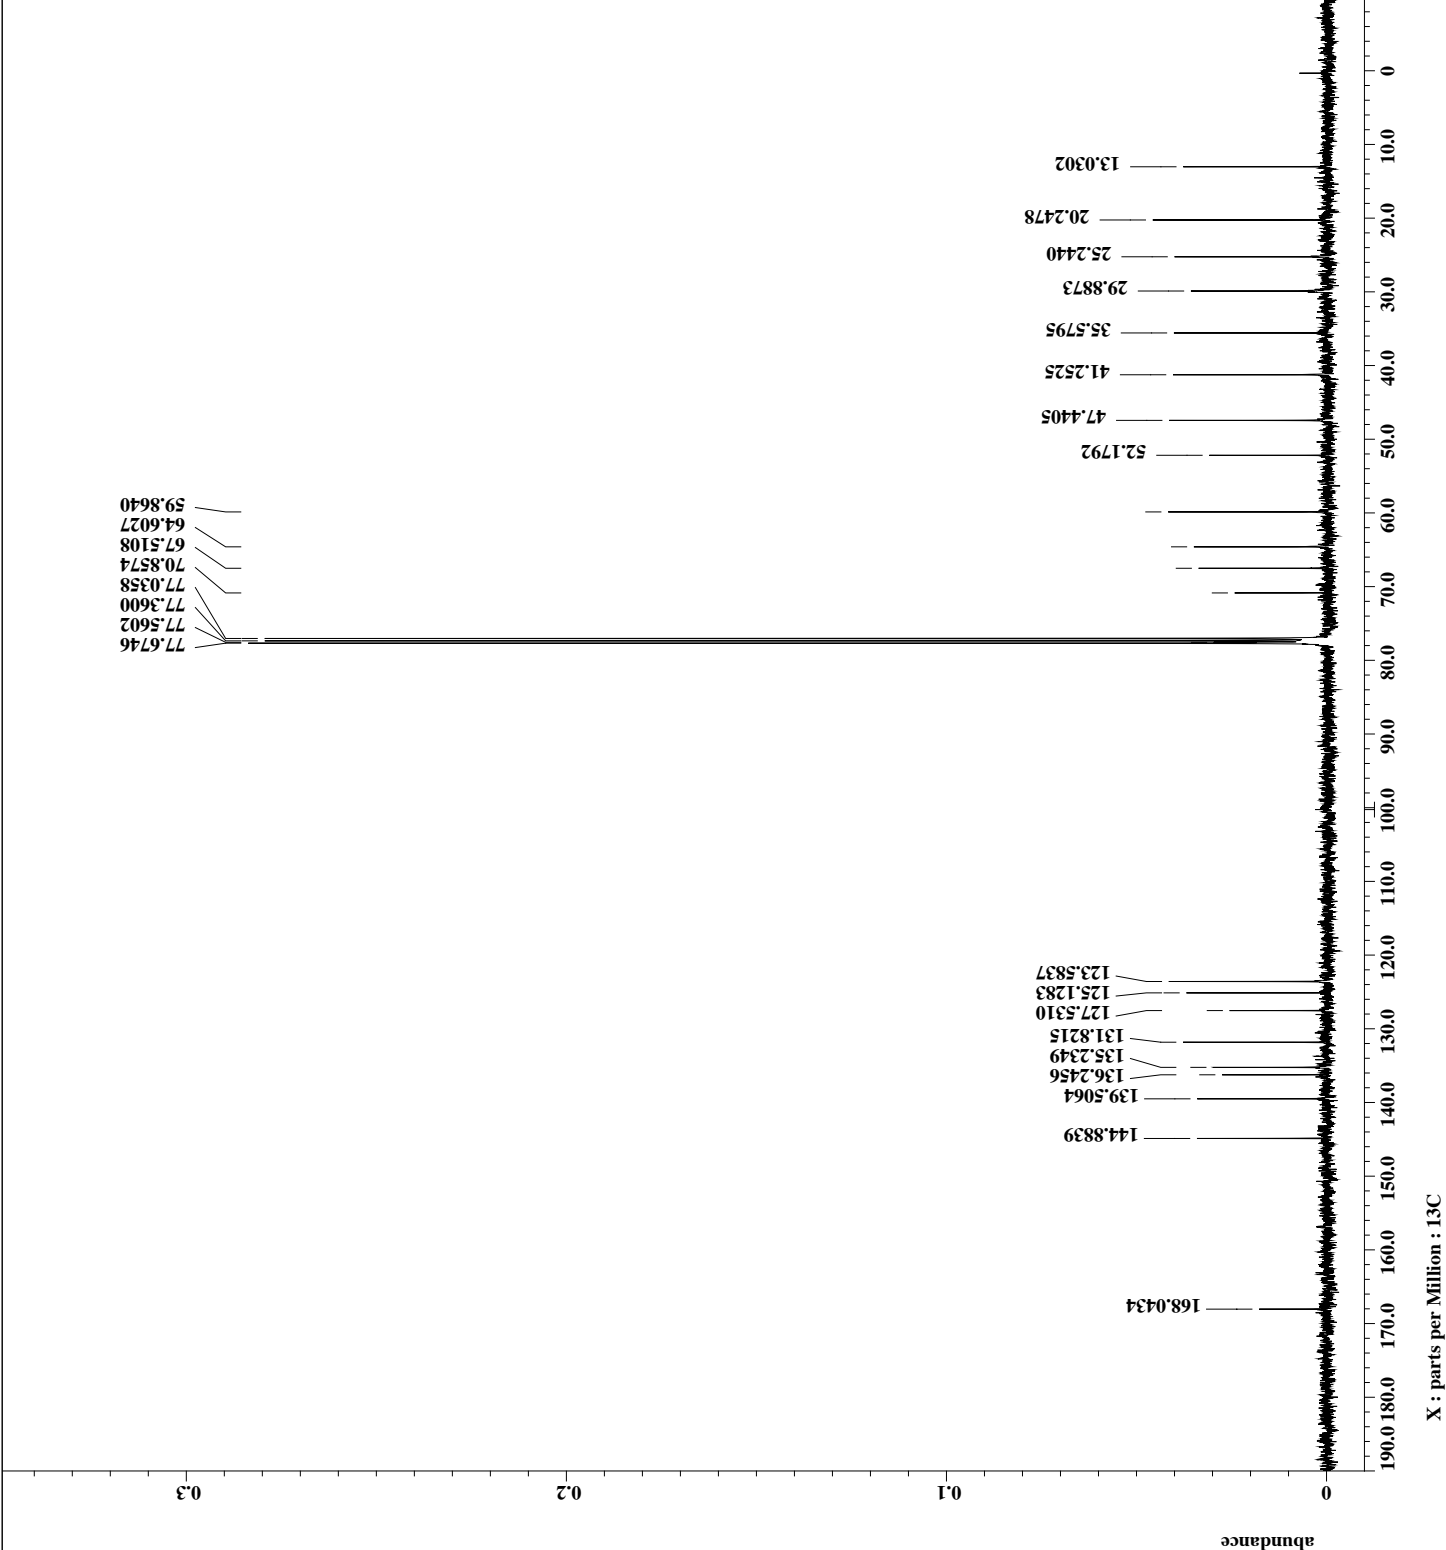

X : parts per Million : 13C

Ir  
 katsum750\_08.1.1  
 Thu Aug 23 14:36:01 2007  
 OBNUC IH  
 EXMOD zg30  
 OBFREQ 750.13 MHz  
 OBSETE 3.60 KHz  
 OBFIN 0.62 Hz  
 POINT 32768  
 FREQU 11261.26 Hz  
 SCANS 16  
 ACQTM 2.9098 sec  
 PD 1.0000 sec  
 PW1 9.85 usec  
 IRNUC 26.9 c  
 CTEMP 7.26 ppm  
 SLVNT CDC13  
 EXREF 0.30 Hz  
 BF 64  
 RGAIN

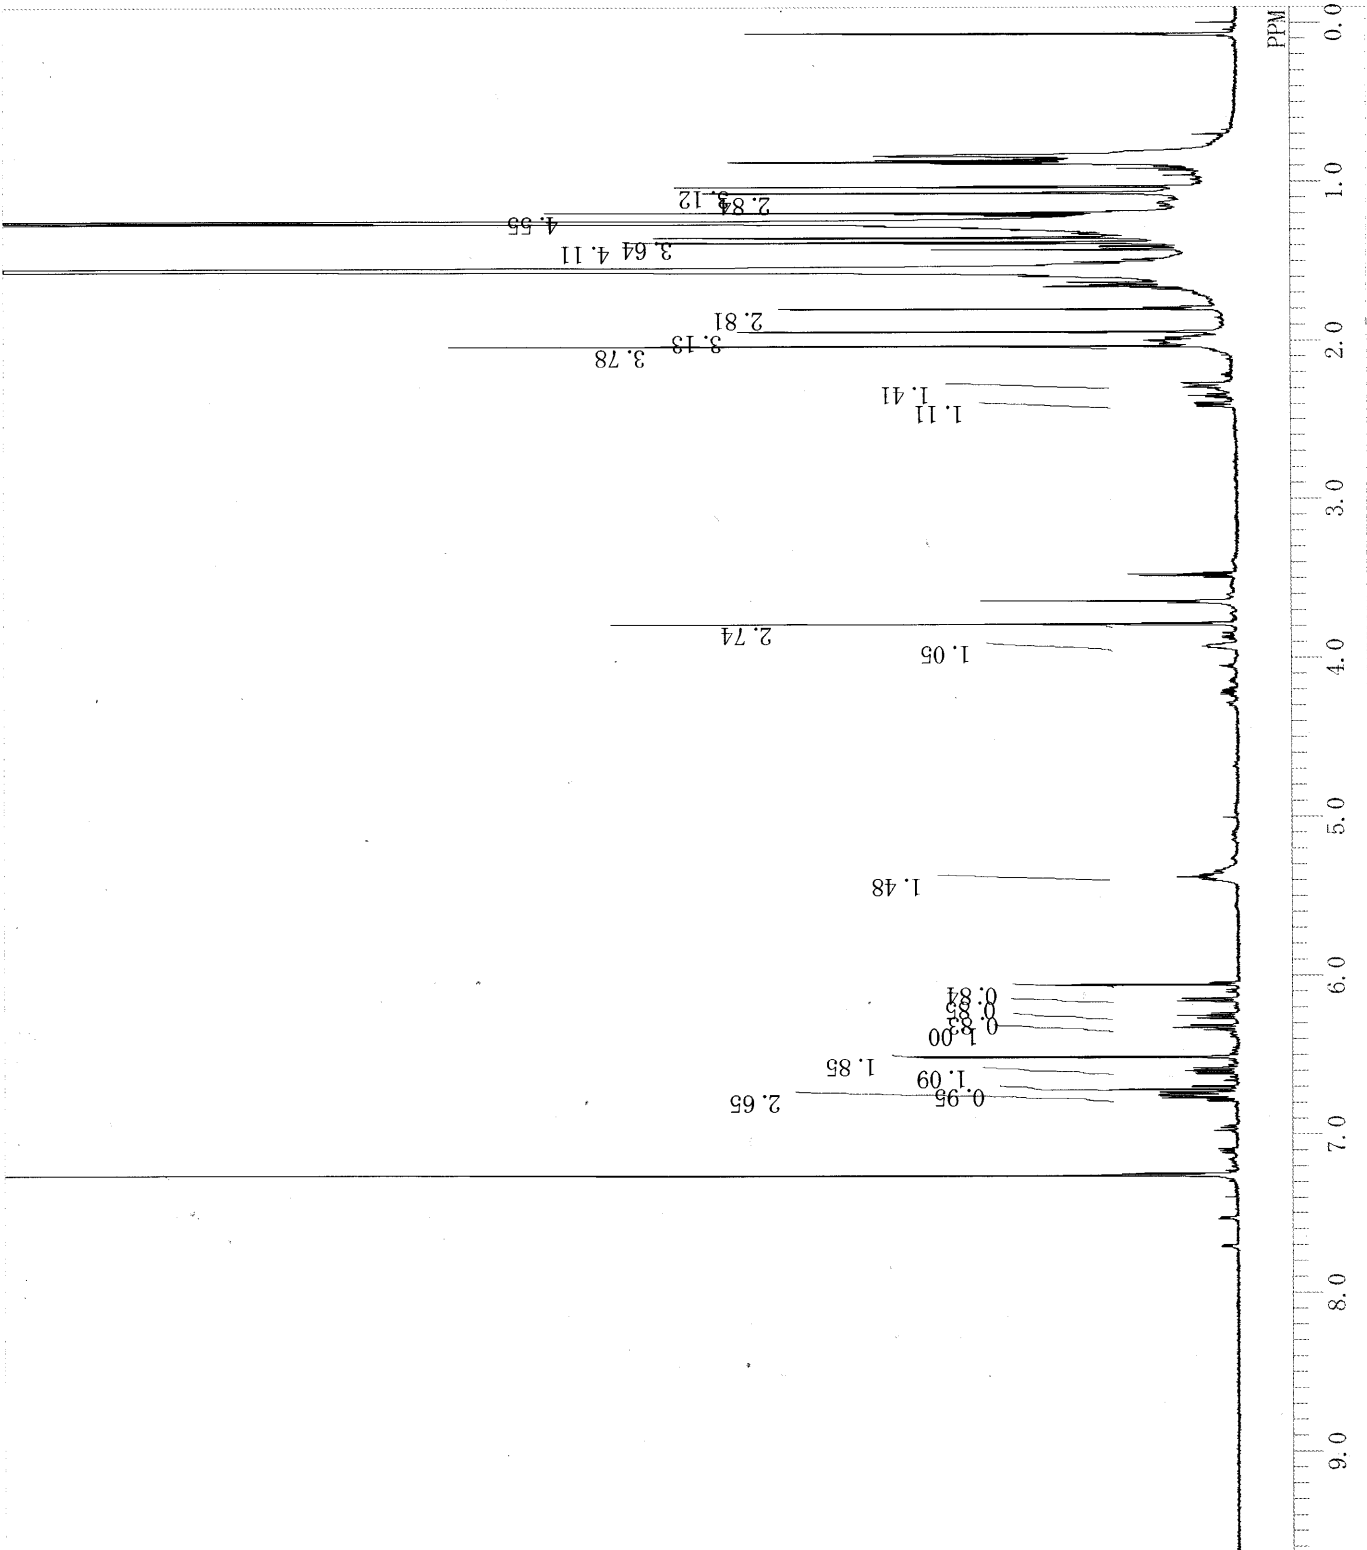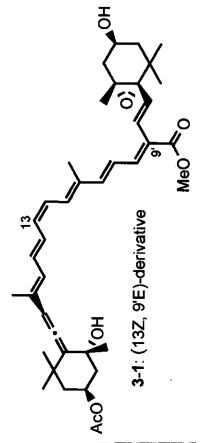

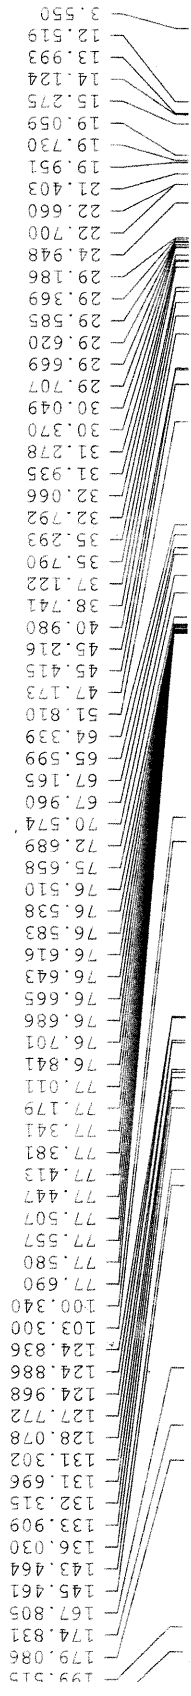

Current Data Parameters  
 NAME katsum750\_08  
 EXPNO 2000  
 PROCNO 1

F2 - Acquisition Parameters  
 Date\_ 20070805  
 Time 23.53  
 INSTRUM spect  
 PROBD 5 mm CPTCI IH-  
 PULPROG zgpg30  
 TD 65402  
 SOLVENT CDCl3  
 NS 4096  
 DS 4  
 SWH 45045.047 Hz  
 FIDRES 0.688741 Hz  
 AQ 0.7260122 sec  
 RG 16384  
 DW 11.100 usec  
 DE 6.00 usec  
 TE 300.0 K  
 D1 2.00000000 sec  
 d11 0.03000000 sec  
 DELTA 1.89999998 sec  
 MCREST 0.00000000 sec  
 MCWRK 0.01500000 sec

=====  
 CHANNEL f1 =====  
 NUC1 13C  
 P1 15.00 usec  
 PL1 -4.90 dB  
 SFO1 188.6392006 MHz

=====  
 CHANNEL f2 =====  
 CPDPRG2 waltz16  
 NUC2 1H  
 PCPD2 100.00 usec  
 PL2 120.00 dB  
 PL12 16.95 dB  
 PL13 16.95 dB  
 SFO2 750.1330005 MHz

F2 - Processing parameters  
 SI 32768  
 SF 188.6203390 MHz  
 WDW EM  
 SSB 0  
 LB 1.00 Hz  
 GB 0  
 PC 0.01

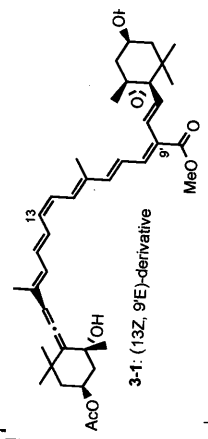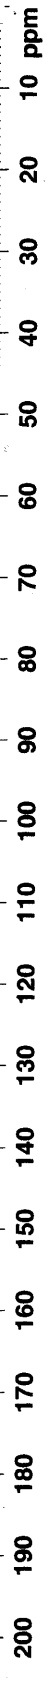





sum/50.0/1.1000.7  
 Z,15'E)-(A-3)/CDC13 /298K(TE=300.5)  
 2{1H} 1Pulse with CPD (zgpg30):CPTCl-Z

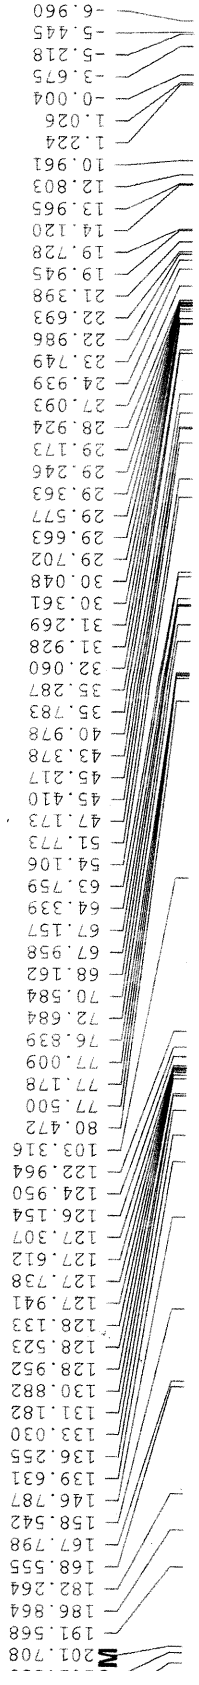

Current Data Parameters  
 NAME katsum750\_07  
 EXPNO 1000  
 PROCNO 1

F2 - Acquisition Parameters  
 Date\_ 20070803  
 Time 23.23

INSTRUM spect  
 PROBHD 5 mm CPYCI 1H  
 PULPROG zgpg30  
 TD 65536  
 SOLVENT CDC13  
 NS 4096  
 DS 4  
 SWH 45045.047 Hz  
 FIDRES 0.667333 Hz  
 AQ 0.7274996 sec  
 RG 16384  
 DW 11.100 usec  
 DE 6.00 usec  
 TE 300.0 K  
 DI 2.00000000 sec  
 GLL 0.03000000 sec  
 DELTA 1.89999998 sec  
 ACRESST 0.00000000 sec  
 PCWRRK 0.01500000 sec

===== CHANNEL f1 =====  
 NUQC1 L3C  
 FL 15.00 usec  
 PLL1 -4.90 dB  
 SFO1 188.6392006 MHz

===== CHANNEL f2 =====  
 CPDPRG2 waltz16  
 NUQC2 IH  
 PCPD2 100.00 usec  
 PLL2 120.00 dB  
 PLL3 16.95 dB  
 PLL4 16.95 dB  
 SFO2 750.1330005 MHz

F2 - Processing parameters  
 SI 32768  
 SF 188.6203403 MHz  
 EN  
 SSB EN  
 LB 1.00 Hz  
 GB 0  
 PC 0.30

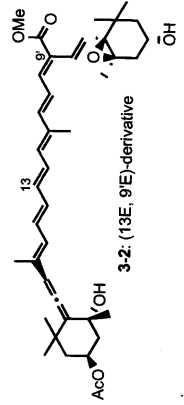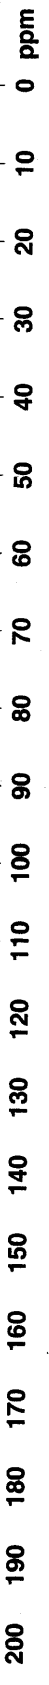

Supplement: c002006k.pdf [file c002006k.pdf]
